# Supplementary material
Source: PubMed Central journal article supplement (PMC3162444)
Supplement: supp_M111.271684_jbc.M111.271684-1.pdf [file supp_M111.271684_jbc.M111.271684-1.pdf]

## **Supplemental Data**

### **Data analysis of microarrays**

Microarray data was processed using RMA normalization (Partek v6.4, Partek Inc. St. Louis, Missouri). Principle component analysis was used to ensure batch and technical variations were within limits. Differences across genotypes were compared using analysis of variance and unpaired *t*-test to look for differences between specific genotypes. This analysis demonstrated that 3212 genes were differentially expressed at a q value of 0.01. For detecting differentially expressed genes, the multiple-test correction of p-value was performed by using the positive false discovery rate (FDR) and genes were filtered by a given q-value threshold (1). For full details of this analysis, see: (2). Where multiple annotations of probes to the same gene occurred these were filtered by selecting genes with the highest mean expression across all genotypes.

### **VMus3D model**

#### *Construction of the VMus3D model*

Construction of VMus3D has previously been described in detail (3). In brief, AC3D version 6 was used to build de-convoluted 3D models of the structural proteins and their arrangements within muscle (4). Data used for the construction of simplified structures was restricted to evidence from vertebrate due to muscle structural similarity and included where possible: protein-protein interaction data from public data repositories (HPRD and BIND), published experimental protein localization data, structural protein data, and previously published diagrammatic representations of the contractile apparatus (5-11).

### *Selection of gene lists using VMus3D*

Gene lists were selected based on the patterns recognised using VMus3D as per the following criteria:

#### ***Equation 1: sham only and reciprocal:***

$$\text{Eq1(i): } p(cS \leq 0.05, dS \leq 0.05)$$

$$\text{DE(+cS, -dS) or DE(-cS, +dS)}$$

$$\text{(ii): } p(cM > 0.05, dM > 0.05)$$

$$\text{DE(+cS, -dS) or DE(-cS, +dS)}$$

#### ***Equation 2: all significant and reciprocal:***

$$\text{Eq2: } p(cS \leq 0.05, dS \leq 0.05, cM \leq 0.05, dM \leq 0.05)$$

$$\text{DE(+cS, -dS) or DE(-cS, +dS)}$$

$$\text{DE(+cM, -dM) or DE(-cM, +dM)}$$

#### ***Equation 3: sham or infarct significant:***

$$\text{Eq3: } p(cS \leq 0.05, dS \leq 0.05) \text{ or } p(cM \leq 0.05, dM \leq 0.05)$$

where,

$$cS = \text{caPI3K sham vs. Ntg sham}$$

$$dS = \text{dnPI3K sham vs. Ntg sham}$$

$$cM = \text{caPI3K MI vs. Ntg MI}$$

$$dM = \text{dnPI3K MI vs. Ntg MI}$$

$$\text{DE} = \text{differentially expressed}$$

A Boolean descriptive index of direction of gene expression across the models was constructed (Supp table III). 183 significant genes were identified as significantly reciprocally differentially expressed in the sham models and 60 genes were identified across all models amongst 973 identified as differentially expressed in either sham (dnPI3K and caPI3K) or MI (dnPI3K and caPI3K) irrespective of direction of expression. Significant differential expression was relative to Ntg mice.

## Gene set enrichment analysis

The resulting gene list generated from equation 3 was subject to gene set enrichment via DAVID (12). The gene list was uploaded using the functional annotation tool; identifier used was official gene symbol and list type selected as gene list using *Mus musculus* as background. All pathways listed in DAVID were selected for generating a functional annotation chart using an unadjusted p-value threshold of 0.05.

## References

1. Storey, J. D., and Tibshirani, R. (2003) *Methods Mol Biol* **224**, 149-157
2. Lin, R. C., Weeks, K. L., Gao, X. M., Williams, R. B., Bernardo, B. C., Kiriazis, H., Matthews, V. B., Woodcock, E. A., Bouwman, R. D., Mollica, J. P., Speirs, H. J., Dawes, I. W., Daly, R. J., Shioi, T., Izumo, S., Febbraio, M. A., Du, X. J., and McMullen, J. R. (2010) *Arterioscler Thromb Vasc Biol* **30**, 724-732
3. Waardenberg, A. J., Reverter, A., Wells, C. A., and Dalrymple, B. P. (2008) *BMC Syst Biol* **2**, 88
4. AC3D Manual. [<http://www.ac3d.org/ac3d/download/ac3dman6b.pdf>]
5. Ervasti, J. M. (2003) *J Biol Chem* **278**, 13591-13594
6. Bader, G. D., Donaldson, I., Wolting, C., Ouellette, B. F., Pawson, T., and Hogue, C. W. (2001) *Nucleic Acids Res* **29**, 242-245
7. Brancaccio, M., Guazzone, S., Menini, N., Sibona, E., Hirsch, E., De Andrea, M., Rocchi, M., Altruda, F., Tarone, G., and Silengo, L. (1999) *J Biol Chem* **274**, 29282-29288
8. Clark, K. A., McElhinny, A. S., Beckerle, M. C., and Gregorio, C. C. (2002) *Annu Rev Cell Dev Biol* **18**, 637-706
9. Davies, K. E., and Nowak, K. J. (2006) *Nat Rev Mol Cell Biol* **7**, 762-773
10. Li, J., Mayne, R., and Wu, C. (1999) *J Cell Biol* **147**, 1391-1398
11. Peri, S., Navarro, J. D., Amanchy, R., Kristiansen, T. Z., Jonnalagadda, C. K., Surendranath, V., Niranjan, V., Muthusamy, B., Gandhi, T. K., Gronborg, M., Ibarrola, N., Deshpande, N., Shanker, K., Shivashankar, H. N., Rashmi, B. P., Ramya, M. A., Zhao, Z., Chandrika, K. N., Padma, N., Harsha, H. C., Yatish, A. J., Kavitha, M. P., Menezes, M., Choudhury, D. R., Suresh, S., Ghosh, N., Saravana, R., Chandran, S., Krishna, S., Joy, M., Anand, S. K., Madavan, V., Joseph, A., Wong, G. W., Schiemann, W. P., Constantinescu, S. N., Huang, L., Khosravi-Far, R., Steen, H., Tewari, M., Ghaffari, S., Blobel, G. C., Dang, C. V., Garcia, J. G., Pevsner, J., Jensen, O. N., Roepstorff, P., Deshpande, K. S., Chinnaiyan, A. M., Hamosh, A., Chakravarti, A., and Pandey, A. (2003) *Genome Res* **13**, 2363-2371
12. Dennis, G., Jr., Sherman, B. T., Hosack, D. A., Yang, J., Gao, W., Lane, H. C., and Lempicki, R. A. (2003) *Genome Biol* **4**, P3

| Supplementary Table 1                                                          |                                                                                  |                                      |                               |              |                |                |                  |
|--------------------------------------------------------------------------------|----------------------------------------------------------------------------------|--------------------------------------|-------------------------------|--------------|----------------|----------------|------------------|
| Transcriptomics data of structural components highlighted from VMus3D analysis |                                                                                  |                                      |                               |              |                |                |                  |
| Probeset ID                                                                    | Gene Title                                                                       | Gene Symbol                          | p-value (GenotypeX Treatment) | Mean(Ntg MI) | StdErr(Ntg MI) | Mean(Ntg Sham) | StdErr(Ntg Sham) |
| 1426043_a_at                                                                   | calpain 3                                                                        | Capn3                                | 4.28E-08                      | 5.51415      | 0.0647418      | 5.5248         | 0.241134         |
| 1426778_at                                                                     | dystroglycan 1                                                                   | Dag1                                 | 0.000334167                   | 10.8459      | 0.0621043      | 10.7952        | 0.0902402        |
| 1456131_x_at                                                                   | dystroglycan 1                                                                   | Dag1                                 | 0.00212354                    | 9.07871      | 0.0982226      | 8.99774        | 0.081506         |
| 1426779_x_at                                                                   | dystroglycan 1                                                                   | Dag1                                 | 0.0027238                     | 9.50981      | 0.0721527      | 9.39697        | 0.0672233        |
| 1447812_x_at                                                                   | filamin C, gamma (actin binding protein 280)                                     | FlnC                                 | 0.00566103                    | 9.60395      | 0.130057       | 9.43989        | 0.104706         |
| 1449073_at                                                                     | filamin C, gamma (actin binding protein 280)                                     | FlnC                                 | 0.0123629                     | 9.166        | 0.134049       | 8.8799         | 0.158383         |
| 1428183_at                                                                     | ankyrin repeat domain 23                                                         | Ankrd23                              | 7.70E-05                      | 12.2842      | 0.114426       | 11.9257        | 0.274857         |
| 1434369_a_at                                                                   | crystallin, alpha B                                                              | Cryab                                | 9.39E-05                      | 13.8655      | 0.0276797      | 13.868         | 0.0354249        |
| 1416455_a_at                                                                   | crystallin, alpha B                                                              | Cryab                                | 0.000212472                   | 14.0607      | 0.0247307      | 13.9853        | 0.0796876        |
| 1423238_at                                                                     | integrin beta 1 binding protein 2                                                | Itgb1bp2                             | 2.29E-06                      | 11.2488      | 0.0801044      | 11.2098        | 0.0296426        |
| 1416752_at                                                                     | LIM domain binding 3                                                             | Ldb3                                 | 0.000135416                   | 12.1496      | 0.0530017      | 12.1842        | 0.0758853        |
| 1450828_at                                                                     | synaptopodin 2                                                                   | Synpo2                               | 1.61E-06                      | 8.3419       | 0.0680548      | 8.33541        | 0.180341         |
| 1452879_at                                                                     | synaptopodin 2                                                                   | Synpo2                               | 1.85E-06                      | 9.62731      | 0.0760364      | 9.48847        | 0.211305         |
| 1428295_at                                                                     | synaptopodin 2-like                                                              | Synpo2l                              | 2.56E-06                      | 8.44492      | 0.158753       | 7.3885         | 0.190618         |
| 1447657_s_at                                                                   | synaptopodin 2-like                                                              | Synpo2l                              | 1.72E-05                      | 11.8887      | 0.0817434      | 11.3438        | 0.236248         |
| 1447658_x_at                                                                   | synaptopodin 2-like                                                              | Synpo2l                              | 1.74E-05                      | 11.6761      | 0.0813851      | 11.2043        | 0.150146         |
| 1451691_at                                                                     | endothelin receptor type A                                                       | Ednra                                | 2.63E-07                      | 8.41884      | 0.0465864      | 8.31592        | 0.139176         |
| 1433525_at                                                                     | endothelin receptor type A                                                       | Ednra                                | 2.92E-07                      | 8.53663      | 0.0250542      | 8.44326        | 0.130773         |
| 1460513_a_at                                                                   | endothelin receptor type A                                                       | Ednra                                | 0.000135476                   | 7.15355      | 0.138155       | 7.24928        | 0.0903131        |
| 1440093_at                                                                     | endothelin receptor type A                                                       | Ednra                                | 0.00657795                    | 5.48236      | 0.0833596      | 5.53833        | 0.104976         |
| 1452982_at                                                                     | insulin-like growth factor I receptor                                            | Igf1r                                | 9.21E-09                      | 8.00033      | 0.0855573      | 7.76825        | 0.0362324        |
| 1428967_at                                                                     | insulin-like growth factor I receptor                                            | Igf1r                                | 0.000141843                   | 5.58115      | 0.101729       | 5.44581        | 0.0507945        |
| 1426565_at                                                                     | insulin-like growth factor I receptor                                            | Igf1r                                | 0.00134888                    | 6.05605      | 0.0644206      | 6.05635        | 0.107263         |
| 1416657_at                                                                     | thymoma viral proto-oncogene 1 /// similar to serine/threonine protein kinase    | Akt1 /// LOC100047666                | 5.68E-08                      | 8.41809      | 0.0374833      | 8.50504        | 0.0467761        |
| 1425711_a_at                                                                   | thymoma viral proto-oncogene 1 /// similar to serine/threonine protein kinase    | Akt1 /// LOC100047666                | 3.95E-05                      | 8.24249      | 0.0457736      | 8.33733        | 0.0431031        |
| 1423104_at                                                                     | insulin receptor substrate 1                                                     | Irs1                                 | 1.02E-09                      | 10.2621      | 0.0781668      | 9.832          | 0.0836127        |
| 1448595_a_at                                                                   | brain expressed gene 1                                                           | Bex1                                 | 6.81E-08                      | 9.25782      | 0.142267       | 8.72464        | 0.710716         |
| 1460585_x_at                                                                   | phosphatidylserine decarboxylase                                                 | Pisd                                 | 1.29E-07                      | 9.54206      | 0.0288596      | 9.76653        | 0.0394972        |
| 1436944_x_at                                                                   | RIKEN cDNA 4933439C20 gene /// phosphatidylserine decarboxylase pseudogene /// p | 4933439C20Rik /// LOC236604 /// Pisd | 0.0134103                     | 8.50912      | 0.129309       | 8.34837        | 0.155516         |
| 1435425_at                                                                     | RIKEN cDNA 4933439C20 gene /// phosphatidylserine decarboxylase                  | 4933439C20Rik /// Pisd               | 0.0380703                     | 6.15373      | 0.0224015      | 6.02385        | 0.0777252        |
| 1435426_s_at                                                                   | RIKEN cDNA 4933439C20 gene /// phosphatidylserine decarboxylase                  | 4933439C20Rik /// Pisd               | 0.64048                       | 4.39328      | 0.116822       | 4.41508        | 0.173436         |
| 1456114_at                                                                     | CDP-diacylglycerol synthase 1                                                    | Cds1                                 | 9.36E-06                      | 5.75564      | 0.0619083      | 5.68678        | 0.0937261        |
| 1428680_at                                                                     | CDP-diacylglycerol synthase 1                                                    | Cds1                                 | 0.000663067                   | 5.30693      | 0.15611        | 5.10555        | 0.146384         |
| 1429862_at                                                                     | phospholipase A2, group IVE                                                      | Pla2g4e                              | 7.61E-06                      | 5.82775      | 0.0458212      | 5.87353        | 0.0323166        |
| 1417814_at                                                                     | phospholipase A2, group V                                                        | Pla2g5                               | 1.65E-10                      | 7.29717      | 0.044195       | 7.30125        | 0.0808955        |
| 1451041_at                                                                     | Rho-associated coiled-coil containing protein kinase 2                           | Rock2                                | 0.001769                      | 9.1754       | 0.0771948      | 8.96659        | 0.120979         |
| 1423592_at                                                                     | Rho-associated coiled-coil containing protein kinase 2                           | Rock2                                | 0.0230171                     | 8.84718      | 0.0581         | 8.54993        | 0.119985         |
| 1437670_x_at                                                                   | CD151 antigen                                                                    | Cd151                                | 4.81E-05                      | 11.3713      | 0.0337425      | 11.2194        | 0.106448         |
| 1456085_x_at                                                                   | CD151 antigen                                                                    | Cd151                                | 8.36E-05                      | 12.4217      | 0.0263093      | 12.2495        | 0.0897386        |
| 1424093_x_at                                                                   | CD151 antigen                                                                    | Cd151                                | 0.000407447                   | 10.6084      | 0.0188943      | 10.4973        | 0.106957         |
| 1451232_at                                                                     | CD151 antigen                                                                    | Cd151                                | 0.00115452                    | 10.5515      | 0.0258109      | 10.3678        | 0.138166         |

| Gene Title                                                                       | Mean(caPI3K MI) | StdErr(caPI3K MI) | Mean(caPI3K Sham) | StdErr(caPI3K Sham) | Mean(dnPI3K MI) | StdErr(dnPI3K MI) | Mean(dnPI3K Sham) | StdErr(dnPI3K Sham) |
|----------------------------------------------------------------------------------|-----------------|-------------------|-------------------|---------------------|-----------------|-------------------|-------------------|---------------------|
| calpain 3                                                                        | 5.90039         | 0.154975          | 6.27228           | 0.156392            | 4.31838         | 0.0785752         | 4.38538           | 0.111122            |
| dystroglycan 1                                                                   | 10.8636         | 0.0326845         | 11.0161           | 0.0244785           | 10.7537         | 0.0344861         | 10.5714           | 0.0260224           |
| dystroglycan 1                                                                   | 9.08977         | 0.0457583         | 9.28701           | 0.0371078           | 8.86798         | 0.0758096         | 8.835             | 0.0488653           |
| dystroglycan 1                                                                   | 9.49399         | 0.0342556         | 9.59743           | 0.0487006           | 9.32493         | 0.0592789         | 9.19277           | 0.0768127           |
| filamin C, gamma (actin binding protein 280)                                     | 9.5739          | 0.0503767         | 9.73098           | 0.0638876           | 9.46736         | 0.122064          | 9.11437           | 0.0765404           |
| filamin C, gamma (actin binding protein 280)                                     | 9.02814         | 0.0767191         | 9.21142           | 0.0556744           | 9.01783         | 0.101555          | 8.62634           | 0.0702658           |
| ankyrin repeat domain 23                                                         | 12.5057         | 0.0634164         | 12.5392           | 0.0619205           | 12.1349         | 0.130628          | 11.3132           | 0.0731619           |
| crystallin, alpha B                                                              | 14.016          | 0.0255856         | 14.0072           | 0.0202924           | 13.8547         | 0.0519824         | 13.7431           | 0.0228331           |
| crystallin, alpha B                                                              | 14.2079         | 0.0347028         | 14.2174           | 0.0234616           | 13.9739         | 0.0642016         | 13.808            | 0.0589953           |
| integrin beta 1 binding protein 2                                                | 11.1671         | 0.0545525         | 11.3797           | 0.0256988           | 10.7693         | 0.0256103         | 11.0427           | 0.0596402           |
| LIM domain binding 3                                                             | 12.1535         | 0.0430578         | 12.3731           | 0.0449605           | 11.9322         | 0.0591673         | 11.9076           | 0.0535927           |
| synaptopodin 2                                                                   | 8.54506         | 0.061612          | 8.85594           | 0.109851            | 7.86964         | 0.0344443         | 7.59211           | 0.118143            |
| synaptopodin 2                                                                   | 9.73295         | 0.0594261         | 10.0289           | 0.0842387           | 9.08943         | 0.0652608         | 8.76629           | 0.0633889           |
| synaptopodin 2-like                                                              | 8.17318         | 0.147026          | 7.73945           | 0.146579            | 9.02553         | 0.221597          | 7.18905           | 0.106171            |
| synaptopodin 2-like                                                              | 11.8367         | 0.0544752         | 11.6068           | 0.0449332           | 12.0945         | 0.133528          | 10.8547           | 0.078513            |
| synaptopodin 2-like                                                              | 11.6195         | 0.0372828         | 11.4256           | 0.0564858           | 11.9868         | 0.137697          | 10.985            | 0.0745224           |
| endothelin receptor type A                                                       | 7.90806         | 0.0821815         | 8.01335           | 0.0611877           | 8.76515         | 0.141953          | 9.12006           | 0.0361452           |
| endothelin receptor type A                                                       | 8.0414          | 0.0597314         | 8.07011           | 0.0737053           | 8.85911         | 0.129568          | 9.17639           | 0.0861077           |
| endothelin receptor type A                                                       | 6.89479         | 0.0638794         | 7.0288            | 0.0645823           | 7.50467         | 0.183027          | 7.81065           | 0.0327946           |
| endothelin receptor type A                                                       | 5.42628         | 0.13              | 5.16744           | 0.100471            | 5.72153         | 0.165928          | 6.09618           | 0.231786            |
| insulin-like growth factor I receptor                                            | 7.73208         | 0.0249535         | 7.55836           | 0.020818            | 8.55173         | 0.110356          | 8.39966           | 0.0655084           |
| insulin-like growth factor I receptor                                            | 5.39923         | 0.0660306         | 5.13376           | 0.0574057           | 5.99898         | 0.171336          | 5.90485           | 0.13018             |
| insulin-like growth factor I receptor                                            | 6.09811         | 0.0523289         | 5.91665           | 0.118937            | 6.60526         | 0.161164          | 6.52609           | 0.128079            |
| thymoma viral proto-oncogene 1 /// similar to serine/threonine protein kinase    | 8.26244         | 0.0215843         | 8.19428           | 0.0447394           | 8.56832         | 0.011011          | 8.7142            | 0.0412696           |
| thymoma viral proto-oncogene 1 /// similar to serine/threonine protein kinase    | 8.0403          | 0.106182          | 8.01213           | 0.0433489           | 8.30153         | 0.0401193         | 8.53888           | 0.0362117           |
| insulin receptor substrate 1                                                     | 9.69582         | 0.0756093         | 9.36007           | 0.0736976           | 10.8603         | 0.144029          | 10.8722           | 0.0718236           |
| brain expressed gene 1                                                           | 7.48161         | 0.132241          | 6.84461           | 0.376696            | 11.1785         | 0.370007          | 11.7645           | 0.0512192           |
| phosphatidylserine decarboxylase                                                 | 9.82328         | 0.0163945         | 9.89878           | 0.016656            | 9.34992         | 0.0470535         | 9.6082            | 0.0671671           |
| RIKEN cDNA 4933439C20 gene /// phosphatidylserine decarboxylase pseudogene /// p | 8.69649         | 0.0550043         | 8.43782           | 0.0644839           | 8.76807         | 0.0716533         | 8.23787           | 0.095918            |
| RIKEN cDNA 4933439C20 gene /// phosphatidylserine decarboxylase                  | 6.07043         | 0.0678648         | 6.27462           | 0.0300251           | 5.89214         | 0.126249          | 6.09039           | 0.0682769           |
| RIKEN cDNA 4933439C20 gene /// phosphatidylserine decarboxylase                  | 4.31641         | 0.0604491         | 4.16094           | 0.0568821           | 4.34412         | 0.119071          | 4.28823           | 0.086738            |
| CDP-diacylglycerol synthase 1                                                    | 5.89724         | 0.0842263         | 6.20452           | 0.114794            | 5.54305         | 0.0513161         | 5.21855           | 0.101993            |
| CDP-diacylglycerol synthase 1                                                    | 5.28577         | 0.159275          | 5.64221           | 0.147127            | 4.62976         | 0.2426            | 4.50397           | 0.0547029           |
| phospholipase A2, group IVE                                                      | 5.88706         | 0.0323284         | 6.10066           | 0.0360656           | 5.50309         | 0.0844635         | 5.50406           | 0.0993139           |
| phospholipase A2, group V                                                        | 7.69497         | 0.0799816         | 8.09725           | 0.068896            | 5.15422         | 0.24367           | 5.69737           | 0.248268            |
| Rho-associated coiled-coil containing protein kinase 2                           | 9.10078         | 0.0583812         | 9.22938           | 0.0386874           | 9.04613         | 0.0300576         | 8.71661           | 0.0808753           |
| Rho-associated coiled-coil containing protein kinase 2                           | 8.71848         | 0.0649425         | 8.70939           | 0.066943            | 8.66298         | 0.0557699         | 8.45294           | 0.0606851           |
| CD151 antigen                                                                    | 11.4739         | 0.0237709         | 11.4234           | 0.0282717           | 11.2239         | 0.0518427         | 10.9719           | 0.036779            |
| CD151 antigen                                                                    | 12.4637         | 0.0421009         | 12.4753           | 0.0232763           | 12.3007         | 0.0584263         | 12.0646           | 0.00463218          |
| CD151 antigen                                                                    | 10.6014         | 0.0355254         | 10.6827           | 0.0337135           | 10.4056         | 0.0580436         | 10.2609           | 0.0248515           |
| CD151 antigen                                                                    | 10.5315         | 0.034843          | 10.6185           | 0.0470119           | 10.3433         | 0.0461168         | 10.1673           | 0.0144076           |

| Gene Title                                                                       | p-value(Ntg MI vs. Ntg Sham) | Ratio(Ntg MI vs. Ntg Sham) | Fold-Change(Ntg MI vs. Ntg Sham) | Fold-Change(Ntg MI vs. Ntg Sham) (Description) | p-value(caPI3K MI vs. Ntg Sham) | Ratio(caPI3K MI vs. Ntg Sham) |
|----------------------------------------------------------------------------------|------------------------------|----------------------------|----------------------------------|------------------------------------------------|---------------------------------|-------------------------------|
| calpain 3                                                                        | 0.959677                     | 0.992649                   | -1.00741                         | Ntg MI down vs Ntg Sham                        | 0.087194                        | 1.29738                       |
| dystroglycan 1                                                                   | 0.490306                     | 1.03575                    | 1.03575                          | Ntg MI up vs Ntg Sham                          | 0.354942                        | 1.0485                        |
| dystroglycan 1                                                                   | 0.412107                     | 1.05773                    | 1.05773                          | Ntg MI up vs Ntg Sham                          | 0.352568                        | 1.06587                       |
| dystroglycan 1                                                                   | 0.210798                     | 1.08135                    | 1.08135                          | Ntg MI up vs Ntg Sham                          | 0.279246                        | 1.06956                       |
| filamin C, gamma (actin binding protein 280)                                     | 0.242365                     | 1.12043                    | 1.12043                          | Ntg MI up vs Ntg Sham                          | 0.336517                        | 1.09734                       |
| filamin C, gamma (actin binding protein 280)                                     | 0.0721608                    | 1.21934                    | 1.21934                          | Ntg MI up vs Ntg Sham                          | 0.335405                        | 1.10821                       |
| ankyrin repeat domain 23                                                         | 0.0885124                    | 1.28211                    | 1.28211                          | Ntg MI up vs Ntg Sham                          | 0.00927118                      | 1.4949                        |
| crystallin, alpha B                                                              | 0.957131                     | 0.998269                   | -1.00173                         | Ntg MI down vs Ntg Sham                        | 0.00467274                      | 1.10805                       |
| crystallin, alpha B                                                              | 0.320327                     | 1.05363                    | 1.05363                          | Ntg MI up vs Ntg Sham                          | 0.00739846                      | 1.16679                       |
| integrin beta 1 binding protein 2                                                | 0.589347                     | 1.02744                    | 1.02744                          | Ntg MI up vs Ntg Sham                          | 0.555802                        | 0.97087                       |
| LIM domain binding 3                                                             | 0.667835                     | 0.976336                   | -1.02424                         | Ntg MI down vs Ntg Sham                        | 0.702823                        | 0.978945                      |
| synaptopodin 2                                                                   | 0.966171                     | 1.0045                     | 1.0045                           | Ntg MI up vs Ntg Sham                          | 0.181228                        | 1.15641                       |
| synaptopodin 2                                                                   | 0.373208                     | 1.10101                    | 1.10101                          | Ntg MI up vs Ntg Sham                          | 0.125202                        | 1.18467                       |
| synaptopodin 2-like                                                              | 0.000274371                  | 2.07975                    | 2.07975                          | Ntg MI up vs Ntg Sham                          | 0.00359905                      | 1.7227                        |
| synaptopodin 2-like                                                              | 0.00590818                   | 1.45892                    | 1.45892                          | Ntg MI up vs Ntg Sham                          | 0.011274                        | 1.40727                       |
| synaptopodin 2-like                                                              | 0.00329024                   | 1.38693                    | 1.38693                          | Ntg MI up vs Ntg Sham                          | 0.00802831                      | 1.33355                       |
| endothelin receptor type A                                                       | 0.450897                     | 1.07394                    | 1.07394                          | Ntg MI up vs Ntg Sham                          | 0.0068272                       | 0.753738                      |
| endothelin receptor type A                                                       | 0.482843                     | 1.06686                    | 1.06686                          | Ntg MI up vs Ntg Sham                          | 0.00639592                      | 0.756878                      |
| endothelin receptor type A                                                       | 0.538932                     | 0.9358                     | -1.0686                          | Ntg MI down vs Ntg Sham                        | 0.0323256                       | 0.78215                       |
| endothelin receptor type A                                                       | 0.788097                     | 0.961954                   | -1.03955                         | Ntg MI down vs Ntg Sham                        | 0.591619                        | 0.925279                      |
| insulin-like growth factor I receptor                                            | 0.0230004                    | 1.17452                    | 1.17452                          | Ntg MI up vs Ntg Sham                          | 0.70306                         | 0.975242                      |
| insulin-like growth factor I receptor                                            | 0.376695                     | 1.09835                    | 1.09835                          | Ntg MI up vs Ntg Sham                          | 0.758686                        | 0.968232                      |
| insulin-like growth factor I receptor                                            | 0.99848                      | 0.999788                   | -1.00021                         | Ntg MI down vs Ntg Sham                        | 0.794571                        | 1.02937                       |
| thymoma viral proto-oncogene 1 /// similar to serine/threonine protein kinase    | 0.107108                     | 0.941511                   | -1.06212                         | Ntg MI down vs Ntg Sham                        | 0.000166308                     | 0.845218                      |
| thymoma viral proto-oncogene 1 /// similar to serine/threonine protein kinase    | 0.260921                     | 0.936378                   | -1.06795                         | Ntg MI down vs Ntg Sham                        | 0.00189212                      | 0.813923                      |
| insulin receptor substrate 1                                                     | 0.00375532                   | 1.34732                    | 1.34732                          | Ntg MI up vs Ntg Sham                          | 0.306146                        | 0.909922                      |
| brain expressed gene 1                                                           | 0.322551                     | 1.44711                    | 1.44711                          | Ntg MI up vs Ntg Sham                          | 0.029081                        | 0.422484                      |
| phosphatidylserine decarboxylase                                                 | 0.000928897                  | 0.855912                   | -1.16834                         | Ntg MI down vs Ntg Sham                        | 0.330658                        | 1.04012                       |
| RIKEN cDNA 4933439C20 gene /// phosphatidylserine decarboxylase pseudogene /// p | 0.279759                     | 1.11787                    | 1.11787                          | Ntg MI up vs Ntg Sham                          | 0.0266871                       | 1.2729                        |
| RIKEN cDNA 4933439C20 gene /// phosphatidylserine decarboxylase                  | 0.229136                     | 1.0942                     | 1.0942                           | Ntg MI up vs Ntg Sham                          | 0.6606                          | 1.03281                       |
| RIKEN cDNA 4933439C20 gene /// phosphatidylserine decarboxylase                  | 0.889909                     | 0.985005                   | -1.01522                         | Ntg MI down vs Ntg Sham                        | 0.533104                        | 0.933895                      |
| CDP-diacylglycerol synthase 1                                                    | 0.584702                     | 1.04889                    | 1.04889                          | Ntg MI up vs Ntg Sham                          | 0.106153                        | 1.15706                       |
| CDP-diacylglycerol synthase 1                                                    | 0.386822                     | 1.1498                     | 1.1498                           | Ntg MI up vs Ntg Sham                          | 0.437703                        | 1.13305                       |
| phospholipase A2, group IVE                                                      | 0.603403                     | 0.968764                   | -1.03224                         | Ntg MI down vs Ntg Sham                        | 0.877578                        | 1.00942                       |
| phospholipase A2, group V                                                        | 0.985184                     | 0.997178                   | -1.00283                         | Ntg MI down vs Ntg Sham                        | 0.0856921                       | 1.31378                       |
| Rho-associated coiled-coil containing protein kinase 2                           | 0.0616913                    | 1.15573                    | 1.15573                          | Ntg MI up vs Ntg Sham                          | 0.216605                        | 1.09748                       |
| Rho-associated coiled-coil containing protein kinase 2                           | 0.0112703                    | 1.2288                     | 1.2288                           | Ntg MI up vs Ntg Sham                          | 0.126863                        | 1.12392                       |
| CD151 antigen                                                                    | 0.0647216                    | 1.11101                    | 1.11101                          | Ntg MI up vs Ntg Sham                          | 0.00400402                      | 1.19294                       |
| CD151 antigen                                                                    | 0.0234334                    | 1.12672                    | 1.12672                          | Ntg MI up vs Ntg Sham                          | 0.00644296                      | 1.16002                       |
| CD151 antigen                                                                    | 0.170669                     | 1.08005                    | 1.08005                          | Ntg MI up vs Ntg Sham                          | 0.197818                        | 1.07482                       |
| CD151 antigen                                                                    | 0.0617712                    | 1.13579                    | 1.13579                          | Ntg MI up vs Ntg Sham                          | 0.0929831                       | 1.12008                       |

| Fold-Change(caPI3K MI vs. Ntg Sham) | Fold-Change(caPI3K MI vs. Ntg Sham) (Description) | p-value(caPI3K Sham vs. Ntg Sham) | Ratio(caPI3K Sham vs. Ntg Sham) | Fold-Change(caPI3K Sham vs. Ntg Sham) | Fold-Change(caPI3K Sham vs. Ntg Sham) (Description) | p-value(dnPI3K MI vs. Ntg Sham) | Ratio(dnPI3K MI vs. Ntg Sham) |
|-------------------------------------|---------------------------------------------------|-----------------------------------|---------------------------------|---------------------------------------|-----------------------------------------------------|---------------------------------|-------------------------------|
| 1.29738                             | caPI3K MI up vs Ntg Sham                          | 0.0020471                         | 1.67886                         | 1.67886                               | caPI3K Sham up vs Ntg Sham                          | 1.67E-05                        | 0.433343                      |
| 1.0485                              | caPI3K MI up vs Ntg Sham                          | 0.00660576                        | 1.16544                         | 1.16544                               | caPI3K Sham up vs Ntg Sham                          | 0.570581                        | 0.971594                      |
| 1.06587                             | caPI3K MI up vs Ntg Sham                          | 0.00769053                        | 1.22202                         | 1.22202                               | caPI3K Sham up vs Ntg Sham                          | 0.195128                        | 0.913983                      |
| 1.06956                             | caPI3K MI up vs Ntg Sham                          | 0.0332756                         | 1.14906                         | 1.14906                               | caPI3K Sham up vs Ntg Sham                          | 0.418278                        | 0.951294                      |
| 1.09734                             | caPI3K MI up vs Ntg Sham                          | 0.0458601                         | 1.22356                         | 1.22356                               | caPI3K Sham up vs Ntg Sham                          | 0.841853                        | 1.01923                       |
| 1.10821                             | caPI3K MI up vs Ntg Sham                          | 0.0400155                         | 1.25833                         | 1.25833                               | caPI3K Sham up vs Ntg Sham                          | 0.369281                        | 1.10032                       |
| 1.4949                              | caPI3K MI up vs Ntg Sham                          | 0.00643256                        | 1.52999                         | 1.52999                               | caPI3K Sham up vs Ntg Sham                          | 0.307209                        | 1.15607                       |
| 1.10805                             | caPI3K MI up vs Ntg Sham                          | 0.00710559                        | 1.10133                         | 1.10133                               | caPI3K Sham up vs Ntg Sham                          | 0.774734                        | 0.990806                      |
| 1.16679                             | caPI3K MI up vs Ntg Sham                          | 0.00559181                        | 1.17446                         | 1.17446                               | caPI3K Sham up vs Ntg Sham                          | 0.878618                        | 0.992112                      |
| -1.03                               | caPI3K MI down vs Ntg Sham                        | 0.0279645                         | 1.12494                         | 1.12494                               | caPI3K Sham up vs Ntg Sham                          | 7.50E-06                        | 0.736866                      |
| -1.02151                            | caPI3K MI down vs Ntg Sham                        | 0.0282896                         | 1.13987                         | 1.13987                               | caPI3K Sham up vs Ntg Sham                          | 0.00516662                      | 0.839746                      |
| 1.15641                             | caPI3K MI up vs Ntg Sham                          | 0.00283603                        | 1.43448                         | 1.43448                               | caPI3K Sham up vs Ntg Sham                          | 0.0063156                       | 0.724084                      |
| 1.18467                             | caPI3K MI up vs Ntg Sham                          | 0.00226408                        | 1.45439                         | 1.45439                               | caPI3K Sham up vs Ntg Sham                          | 0.0171772                       | 0.75836                       |
| 1.7227                              | caPI3K MI up vs Ntg Sham                          | 0.151895                          | 1.27539                         | 1.27539                               | caPI3K Sham up vs Ntg Sham                          | 1.61E-06                        | 3.11024                       |
| 1.40727                             | caPI3K MI up vs Ntg Sham                          | 0.149345                          | 1.19999                         | 1.19999                               | caPI3K Sham up vs Ntg Sham                          | 0.000431716                     | 1.68267                       |
| 1.33355                             | caPI3K MI up vs Ntg Sham                          | 0.129576                          | 1.16584                         | 1.16584                               | caPI3K Sham up vs Ntg Sham                          | 2.50E-05                        | 1.72023                       |
| -1.32672                            | caPI3K MI down vs Ntg Sham                        | 0.0360276                         | 0.810805                        | -1.23334                              | caPI3K Sham down vs Ntg Sham                        | 0.00345525                      | 1.36531                       |
| -1.32122                            | caPI3K MI down vs Ntg Sham                        | 0.0103192                         | 0.772093                        | -1.29518                              | caPI3K Sham down vs Ntg Sham                        | 0.00505566                      | 1.33408                       |
| -1.27853                            | caPI3K MI down vs Ntg Sham                        | 0.166294                          | 0.858281                        | -1.16512                              | caPI3K Sham down vs Ntg Sham                        | 0.111991                        | 1.19366                       |
| -1.08076                            | caPI3K MI down vs Ntg Sham                        | 0.0873173                         | 0.773305                        | -1.29315                              | caPI3K Sham down vs Ntg Sham                        | 0.383553                        | 1.1354                        |
| -1.02539                            | caPI3K MI down vs Ntg Sham                        | 0.0373653                         | 0.864603                        | -1.15666                              | caPI3K Sham down vs Ntg Sham                        | 1.24E-07                        | 1.72128                       |
| -1.03281                            | caPI3K MI down vs Ntg Sham                        | 0.0510981                         | 0.805498                        | -1.24147                              | caPI3K Sham down vs Ntg Sham                        | 0.00162164                      | 1.46731                       |
| 1.02937                             | caPI3K MI up vs Ntg Sham                          | 0.388321                          | 0.907705                        | -1.10168                              | caPI3K Sham down vs Ntg Sham                        | 0.00271171                      | 1.46297                       |
| -1.18313                            | caPI3K MI down vs Ntg Sham                        | 9.94E-06                          | 0.806218                        | -1.24036                              | caPI3K Sham down vs Ntg Sham                        | 0.233007                        | 1.04483                       |
| -1.22862                            | caPI3K MI down vs Ntg Sham                        | 0.000877869                       | 0.798188                        | -1.25284                              | caPI3K Sham down vs Ntg Sham                        | 0.666508                        | 0.975492                      |
| -1.099                              | caPI3K MI down vs Ntg Sham                        | 0.00183141                        | 0.720996                        | -1.38697                              | caPI3K Sham down vs Ntg Sham                        | 2.66E-07                        | 2.03969                       |
| -2.36696                            | caPI3K MI down vs Ntg Sham                        | 0.00210888                        | 0.271678                        | -3.68083                              | caPI3K Sham down vs Ntg Sham                        | 0.000185885                     | 5.47878                       |
| 1.04012                             | caPI3K MI up vs Ntg Sham                          | 0.0316342                         | 1.09601                         | 1.09601                               | caPI3K Sham up vs Ntg Sham                          | 8.17E-07                        | 0.749183                      |
| 1.2729                              | caPI3K MI up vs Ntg Sham                          | 0.54296                           | 1.06396                         | 1.06396                               | caPI3K Sham up vs Ntg Sham                          | 0.0093501                       | 1.33765                       |
| 1.03281                             | caPI3K MI up vs Ntg Sham                          | 0.027219                          | 1.18984                         | 1.18984                               | caPI3K Sham up vs Ntg Sham                          | 0.222879                        | 0.912749                      |
| -1.07078                            | caPI3K MI down vs Ntg Sham                        | 0.119025                          | 0.838487                        | -1.19262                              | caPI3K Sham down vs Ntg Sham                        | 0.653136                        | 0.952008                      |
| 1.15706                             | caPI3K MI up vs Ntg Sham                          | 0.000557073                       | 1.43171                         | 1.43171                               | caPI3K Sham up vs Ntg Sham                          | 0.260518                        | 0.905171                      |
| 1.13305                             | caPI3K MI up vs Ntg Sham                          | 0.0295517                         | 1.45061                         | 1.45061                               | caPI3K Sham up vs Ntg Sham                          | 0.0505336                       | 0.719072                      |
| 1.00942                             | caPI3K MI up vs Ntg Sham                          | 0.0172297                         | 1.1705                          | 1.1705                                | caPI3K Sham up vs Ntg Sham                          | 0.000451922                     | 0.773545                      |
| 1.31378                             | caPI3K MI up vs Ntg Sham                          | 0.00172781                        | 1.73628                         | 1.73628                               | caPI3K Sham up vs Ntg Sham                          | 1.02E-08                        | 0.225778                      |
| 1.09748                             | caPI3K MI up vs Ntg Sham                          | 0.0219503                         | 1.1998                          | 1.1998                                | caPI3K Sham up vs Ntg Sham                          | 0.457635                        | 1.05668                       |
| 1.12392                             | caPI3K MI up vs Ntg Sham                          | 0.147305                          | 1.11687                         | 1.11687                               | caPI3K Sham up vs Ntg Sham                          | 0.297191                        | 1.08151                       |
| 1.19294                             | caPI3K MI up vs Ntg Sham                          | 0.0165252                         | 1.15191                         | 1.15191                               | caPI3K Sham up vs Ntg Sham                          | 0.954406                        | 1.00311                       |
| 1.16002                             | caPI3K MI up vs Ntg Sham                          | 0.00446375                        | 1.16941                         | 1.16941                               | caPI3K Sham up vs Ntg Sham                          | 0.47129                         | 1.03609                       |
| 1.07482                             | caPI3K MI up vs Ntg Sham                          | 0.0284879                         | 1.13713                         | 1.13713                               | caPI3K Sham up vs Ntg Sham                          | 0.253802                        | 0.938368                      |
| 1.12008                             | caPI3K MI up vs Ntg Sham                          | 0.0141209                         | 1.1897                          | 1.1897                                | caPI3K Sham up vs Ntg Sham                          | 0.793106                        | 0.983127                      |

| Fold-Change(dnPI3K MI vs. Ntg Sham) | Fold-Change(dnPI3K MI vs. Ntg Sham) (Description) | p-value(dnPI3K Sham vs. Ntg Sham) | Ratio(dnPI3K Sham vs. Ntg Sham) | Fold-Change (dnPI3K Sham vs. Ntg Sham) | Fold-Change(dnPI3K Sham vs. Ntg Sham) (Description) | F(GenotypeX Treatment) | F(Error) | Entrez Gene           |
|-------------------------------------|---------------------------------------------------|-----------------------------------|---------------------------------|----------------------------------------|-----------------------------------------------------|------------------------|----------|-----------------------|
| -2.30764                            | dnPI3K MI down vs Ntg Sham                        | 3.27E-05                          | 0.453944                        | -2.20291                               | dnPI3K Sham down vs Ntg Sham                        | 29.6911                | 1        | 12335                 |
| -1.02924                            | dnPI3K MI down vs Ntg Sham                        | 0.00603025                        | 0.856262                        | -1.16787                               | dnPI3K Sham down vs Ntg Sham                        | 8.26158                | 1        | 13138                 |
| -1.09411                            | dnPI3K MI down vs Ntg Sham                        | 0.108717                          | 0.893322                        | -1.11942                               | dnPI3K Sham down vs Ntg Sham                        | 5.90263                | 1        | 13138                 |
| -1.0512                             | dnPI3K MI down vs Ntg Sham                        | 0.0304881                         | 0.868022                        | -1.15205                               | dnPI3K Sham down vs Ntg Sham                        | 5.61878                | 1        | 13138                 |
| 1.01923                             | dnPI3K MI up vs Ntg Sham                          | 0.0275093                         | 0.798012                        | -1.25311                               | dnPI3K Sham down vs Ntg Sham                        | 4.82554                | 1        | 68794                 |
| 1.10032                             | dnPI3K MI up vs Ntg Sham                          | 0.107678                          | 0.838821                        | -1.19215                               | dnPI3K Sham down vs Ntg Sham                        | 4.04068                | 1        | 68794                 |
| 1.15607                             | dnPI3K MI up vs Ntg Sham                          | 0.00650534                        | 0.654062                        | -1.52891                               | dnPI3K Sham down vs Ntg Sham                        | 10.499                 | 1        | 78321                 |
| -1.00928                            | dnPI3K MI down vs Ntg Sham                        | 0.0139476                         | 0.917068                        | -1.09043                               | dnPI3K Sham down vs Ntg Sham                        | 10.1739                | 1        | 12955                 |
| -1.00795                            | dnPI3K MI down vs Ntg Sham                        | 0.0271673                         | 0.884326                        | -1.1308                                | dnPI3K Sham down vs Ntg Sham                        | 8.91396                | 1        | 12955                 |
| -1.3571                             | dnPI3K MI down vs Ntg Sham                        | 0.0302669                         | 0.890631                        | -1.1228                                | dnPI3K Sham down vs Ntg Sham                        | 17.5673                | 1        | 26549                 |
| -1.19084                            | dnPI3K MI down vs Ntg Sham                        | 0.00260277                        | 0.825563                        | -1.21129                               | dnPI3K Sham down vs Ntg Sham                        | 9.59542                | 1        | 24131                 |
| -1.38105                            | dnPI3K MI down vs Ntg Sham                        | 0.000107764                       | 0.59737                         | -1.674                                 | dnPI3K Sham down vs Ntg Sham                        | 18.4359                | 1        | 118449                |
| -1.31863                            | dnPI3K MI down vs Ntg Sham                        | 0.000159806                       | 0.606178                        | -1.64968                               | dnPI3K Sham down vs Ntg Sham                        | 18.0924                | 1        | 118449                |
| 3.11024                             | dnPI3K MI up vs Ntg Sham                          | 0.40626                           | 0.870881                        | -1.14826                               | dnPI3K Sham down vs Ntg Sham                        | 17.2989                | 1        | 68760                 |
| 1.68267                             | dnPI3K MI up vs Ntg Sham                          | 0.0118235                         | 0.712506                        | -1.4035                                | dnPI3K Sham down vs Ntg Sham                        | 13.1824                | 1        | 68760                 |
| 1.72023                             | dnPI3K MI up vs Ntg Sham                          | 0.133106                          | 0.859027                        | -1.16411                               | dnPI3K Sham down vs Ntg Sham                        | 13.1568                | 1        | 68760                 |
| 1.36531                             | dnPI3K MI up vs Ntg Sham                          | 1.08E-05                          | 1.7461                          | 1.7461                                 | dnPI3K Sham up vs Ntg Sham                          | 23.4956                | 1        | 13617                 |
| 1.33408                             | dnPI3K MI up vs Ntg Sham                          | 2.44E-05                          | 1.66224                         | 1.66224                                | dnPI3K Sham up vs Ntg Sham                          | 23.1712                | 1        | 13617                 |
| 1.19366                             | dnPI3K MI up vs Ntg Sham                          | 0.00173923                        | 1.47567                         | 1.47567                                | dnPI3K Sham up vs Ntg Sham                          | 9.59472                | 1        | 13617                 |
| 1.1354                              | dnPI3K MI up vs Ntg Sham                          | 0.0140511                         | 1.47208                         | 1.47208                                | dnPI3K Sham up vs Ntg Sham                          | 4.66994                | 1        | 13617                 |
| 1.72128                             | dnPI3K MI up vs Ntg Sham                          | 2.46E-06                          | 1.54908                         | 1.54908                                | dnPI3K Sham up vs Ntg Sham                          | 35.9949                | 1        | 16001                 |
| 1.46731                             | dnPI3K MI up vs Ntg Sham                          | 0.00653683                        | 1.37463                         | 1.37463                                | dnPI3K Sham up vs Ntg Sham                          | 9.52372                | 1        | 16001                 |
| 1.46297                             | dnPI3K MI up vs Ntg Sham                          | 0.00815837                        | 1.38486                         | 1.38486                                | dnPI3K Sham up vs Ntg Sham                          | 6.43945                | 1        | 16001                 |
| 1.04483                             | dnPI3K MI up vs Ntg Sham                          | 0.000703179                       | 1.15601                         | 1.15601                                | dnPI3K Sham up vs Ntg Sham                          | 28.6392                | 1        | 100047666 /// 11651   |
| -1.02512                            | dnPI3K MI down vs Ntg Sham                        | 0.0239006                         | 1.14993                         | 1.14993                                | dnPI3K Sham up vs Ntg Sham                          | 11.6373                | 1        | 100047666 /// 11651   |
| 2.03969                             | dnPI3K MI up vs Ntg Sham                          | 2.26E-07                          | 2.05658                         | 2.05658                                | dnPI3K Sham up vs Ntg Sham                          | 47.1402                | 1        | 16367                 |
| 5.47878                             | dnPI3K MI up vs Ntg Sham                          | 1.70E-05                          | 8.22394                         | 8.22394                                | dnPI3K Sham up vs Ntg Sham                          | 27.9818                | 1        | 19716                 |
| -1.33479                            | dnPI3K MI down vs Ntg Sham                        | 0.0121048                         | 0.896062                        | -1.11599                               | dnPI3K Sham down vs Ntg Sham                        | 25.7804                | 1        | 320951                |
| 1.33765                             | dnPI3K MI up vs Ntg Sham                          | 0.453607                          | 0.92627                         | -1.0796                                | dnPI3K Sham down vs Ntg Sham                        | 3.96236                | 1        | 236604 /// 320951 /// |
| -1.09559                            | dnPI3K MI down vs Ntg Sham                        | 0.531622                          | 1.0472                          | 1.0472                                 | dnPI3K Sham up vs Ntg Sham                          | 3.00815                | 1        | 320951 /// 66776      |
| -1.05041                            | dnPI3K MI down vs Ntg Sham                        | 0.424605                          | 0.915829                        | -1.09191                               | dnPI3K Sham down vs Ntg Sham                        | 0.685539               | 1        | 320951 /// 66776      |
| -1.10476                            | dnPI3K MI down vs Ntg Sham                        | 0.00135782                        | 0.722851                        | -1.38341                               | dnPI3K Sham down vs Ntg Sham                        | 14.4046                | 1        | 74596                 |
| -1.39068                            | dnPI3K MI down vs Ntg Sham                        | 0.0163054                         | 0.65903                         | -1.51738                               | dnPI3K Sham down vs Ntg Sham                        | 7.33288                | 1        | 74596                 |
| -1.29275                            | dnPI3K MI down vs Ntg Sham                        | 0.000463295                       | 0.774065                        | -1.29188                               | dnPI3K Sham down vs Ntg Sham                        | 14.84                  | 1        | 329502                |
| -4.42913                            | dnPI3K MI down vs Ntg Sham                        | 7.21E-07                          | 0.328992                        | -3.03959                               | dnPI3K Sham down vs Ntg Sham                        | 58.6466                | 1        | 18784                 |
| 1.05668                             | dnPI3K MI up vs Ntg Sham                          | 0.0282571                         | 0.84091                         | -1.18919                               | dnPI3K Sham down vs Ntg Sham                        | 6.11565                | 1        | 19878                 |
| 1.08151                             | dnPI3K MI up vs Ntg Sham                          | 0.369197                          | 0.934983                        | -1.06954                               | dnPI3K Sham down vs Ntg Sham                        | 3.45707                | 1        | 19878                 |
| 1.00311                             | dnPI3K MI up vs Ntg Sham                          | 0.00489994                        | 0.842384                        | -1.18711                               | dnPI3K Sham down vs Ntg Sham                        | 11.2937                | 1        | 12476                 |
| 1.03609                             | dnPI3K MI up vs Ntg Sham                          | 0.0159089                         | 0.879664                        | -1.1368                                | dnPI3K Sham down vs Ntg Sham                        | 10.3634                | 1        | 12476                 |
| -1.06568                            | dnPI3K MI down vs Ntg Sham                        | 0.00709198                        | 0.848846                        | -1.17807                               | dnPI3K Sham down vs Ntg Sham                        | 7.98581                | 1        | 12476                 |
| -1.01716                            | dnPI3K MI down vs Ntg Sham                        | 0.0432581                         | 0.870234                        | -1.14912                               | dnPI3K Sham down vs Ntg Sham                        | 6.62948                | 1        | 12476                 |



| Gene Ontology Biological Process                                      | Gene Ontology Cellular Component                                     | Gene Ontology Molecular Function                       | MGI Name                        |
|-----------------------------------------------------------------------|----------------------------------------------------------------------|--------------------------------------------------------|---------------------------------|
| 0006006 // glucose metabolic process // inferred from                 | 0005622 // intracellular // inferred from electron microscopy        | 0004197 // cysteine-type endopeptidase activity        | 107437                          |
| 0002011 // morphogenesis of an epithelial sheet                       | 0005576 // extracellular region // inferred from electron microscopy | 0005509 // calcium ion binding // inferred from        | 101864                          |
| 0002011 // morphogenesis of an epithelial sheet                       | 0005576 // extracellular region // inferred from electron microscopy | 0005509 // calcium ion binding // inferred from        | 101864                          |
| 0002011 // morphogenesis of an epithelial sheet                       | 0005576 // extracellular region // inferred from electron microscopy | 0005509 // calcium ion binding // inferred from        | 101864                          |
| 0030029 // actin filament-based process // traceable author           | 0005737 // cytoplasm // inferred from electron microscopy            | 0003779 // actin binding // traceable author           | 95557                           |
| 0030029 // actin filament-based process // traceable author           | 0005737 // cytoplasm // inferred from electron microscopy            | 0003779 // actin binding // traceable author           | 95557                           |
| 0006631 // fatty acid metabolic process // inferred from direct assay | 0005634 // nucleus // inferred from direct assay                     | ---                                                    | 1925571                         |
| 0007169 // transmembrane receptor protein tyrosine kinase activity    | 0005625 // soluble fraction // inferred from electron microscopy     | 0005212 // structural constituent of eye lens          | 88516                           |
| 0007169 // transmembrane receptor protein tyrosine kinase activity    | 0005625 // soluble fraction // inferred from electron microscopy     | 0005212 // structural constituent of eye lens          | 88516                           |
| 0007229 // integrin-mediated signaling pathway                        | 0030018 // Z disc // inferred from direct assay                      | 0005509 // calcium ion binding // inferred from        | 1353420                         |
| ---                                                                   | 0005737 // cytoplasm // inferred from electron microscopy            | 0005080 // protein kinase C binding // inferred from   | 1344412                         |
| ---                                                                   | 0005634 // nucleus // inferred from electron microscopy              | 0003779 // actin binding // not recorded /             | 2153070                         |
| ---                                                                   | 0005634 // nucleus // inferred from electron microscopy              | 0003779 // actin binding // not recorded /             | 2153070                         |
| ---                                                                   | 0005737 // cytoplasm // inferred from electron microscopy            | 0003779 // actin binding // inferred from              | 1916010                         |
| ---                                                                   | 0005737 // cytoplasm // inferred from electron microscopy            | 0003779 // actin binding // inferred from              | 1916010                         |
| ---                                                                   | 0005737 // cytoplasm // inferred from electron microscopy            | 0003779 // actin binding // inferred from              | 1916010                         |
| 0001569 // patterning of blood vessels // inferred from               | 0005886 // plasma membrane // inferred from electron microscopy      | 0001584 // rhodopsin-like receptor activity            | 105923                          |
| 0001569 // patterning of blood vessels // inferred from               | 0005886 // plasma membrane // inferred from electron microscopy      | 0001584 // rhodopsin-like receptor activity            | ---                             |
| 0001569 // patterning of blood vessels // inferred from               | 0005886 // plasma membrane // inferred from electron microscopy      | 0001584 // rhodopsin-like receptor activity            | 105923                          |
| 0001569 // patterning of blood vessels // inferred from               | 0005886 // plasma membrane // inferred from electron microscopy      | 0001584 // rhodopsin-like receptor activity            | 105923                          |
| 0006468 // protein amino acid phosphorylation                         | 0016020 // membrane // inferred from electron microscopy             | 0000166 // nucleotide binding // inferred from         | ---                             |
| 0006468 // protein amino acid phosphorylation                         | 0016020 // membrane // inferred from electron microscopy             | 0000166 // nucleotide binding // inferred from         | 96433                           |
| 0006468 // protein amino acid phosphorylation                         | 0016020 // membrane // inferred from electron microscopy             | 0000166 // nucleotide binding // inferred from         | 96433                           |
| 0000060 // protein import into nucleus, transmembrane transport       | 0005634 // nucleus // inferred from electron microscopy              | 0000166 // nucleotide binding // inferred from         | 87986 /// 87986                 |
| 0000060 // protein import into nucleus, transmembrane transport       | 0005634 // nucleus // inferred from electron microscopy              | 0000166 // nucleotide binding // inferred from         | 87986 /// 87986                 |
| 0002053 // positive regulation of mesenchymal cell proliferation      | 0005634 // nucleus // inferred from direct assay                     | 0004871 // signal transducer activity // inferred from | ---                             |
| 0002052 // positive regulation of neuroblastoma cell proliferation    | 0005634 // nucleus // inferred from direct assay                     | 0005515 // protein binding // inferred from            | 1328321                         |
| 0008654 // phospholipid biosynthetic process                          | 0005739 // mitochondrion // inferred from electron microscopy        | 0004609 // phosphatidylserine decarboxylase activity   | 2445114                         |
| 0008654 // phospholipid biosynthetic process                          | 0005739 // mitochondrion // inferred from electron microscopy        | 0004609 // phosphatidylserine decarboxylase activity   | 1914026 /// 1914026 /// 1914026 |
| 0008654 // phospholipid biosynthetic process                          | 0005739 // mitochondrion // inferred from electron microscopy        | 0004609 // phosphatidylserine decarboxylase activity   | 1914026 /// 1914026             |
| 0008654 // phospholipid biosynthetic process                          | 0005783 // endoplasmic reticulum // inferred from                    | 0000287 // magnesium ion binding // inferred from      | 1921846                         |
| 0008654 // phospholipid biosynthetic process                          | 0005783 // endoplasmic reticulum // inferred from                    | 0000287 // magnesium ion binding // inferred from      | 1921846                         |
| 0008152 // metabolic process // inferred from                         | 0005737 // cytoplasm // inferred from direct assay                   | 0004620 // phospholipase activity // inferred from     | 1919144                         |
| 0006644 // phospholipid metabolic process // inferred from            | 0005576 // extracellular region // inferred from electron microscopy | 0004623 // phospholipase A2 activity // inferred from  | 101899                          |
| 0000910 // cytokinesis // inferred from electron microscopy           | 0005622 // intracellular // inferred from electron microscopy        | 0000166 // nucleotide binding // inferred from         | ---                             |
| 0000910 // cytokinesis // inferred from electron microscopy           | 0005622 // intracellular // inferred from electron microscopy        | 0000166 // nucleotide binding // inferred from         | 107926                          |
| 0001701 // in utero embryonic development                             | 0005634 // nucleus // inferred from direct assay                     | 0003676 // nucleic acid binding // inferred from       | 1096360                         |
| 0001701 // in utero embryonic development                             | 0005634 // nucleus // inferred from direct assay                     | 0003676 // nucleic acid binding // inferred from       | 1096360                         |
| 0007601 // visual perception // inferred from                         | 0016020 // membrane // inferred from electron microscopy             | ---                                                    | 1096360                         |
| 0007601 // visual perception // inferred from                         | 0016020 // membrane // inferred from electron microscopy             | ---                                                    | 1096360                         |

| Supplementary Table II |                                                                                                  |       |         |          |                                                                                                         |            |          |           |                 |            |           |          |
|------------------------|--------------------------------------------------------------------------------------------------|-------|---------|----------|---------------------------------------------------------------------------------------------------------|------------|----------|-----------|-----------------|------------|-----------|----------|
| Category               | Term                                                                                             | Count | %       | PValue   | Genes                                                                                                   | List Total | Pop Hits | Pop Total | Fold Enrichment | Bonferroni | Benjamini | FDR      |
| KEGG_PATHWAY           | mmu03010:Ribosome                                                                                | 18    | 2.17918 | 3.85E-08 | RPL18,RPS9,RPS4X,RPS5,RPS7,RPS3,RPS25,RPS27,RPL7,RPL23,RPL18A,RPS17,RPLP0,RPLP1,RPS15,RPL11,RPL12,RPS21 | 225        | 89       | 5738      | 5.157752809     | 5.82E-06   | 5.82E-06  | 4.61E-05 |
| BIOCARTA               | m_igf1rPathway:Multiple antiapoptotic pathways from IGF-1R signaling lead to BAD phosphorylation | 5     | 0.60533 | 0.004093 | IGF1R,GRB2,RAF1,BAD,IRS1                                                                                | 44         | 19       | 1171      | 7.003588517     | 0.36308614 | 0.3630861 | 4.527815 |
| KEGG_PATHWAY           | mmu04510:Focal adhesion                                                                          | 16    | 1.93705 | 0.010107 | MYL7,ROCK2,GRB2,MYLK3,RAF1,BAD,MAPK10,FLNC,IGF1R,PPP1CA,LAMB3,CCND2,ITGB6,LAMB1-1,EGF,COL11A1           | 225        | 198      | 5738      | 2.060785634     | 0.78430494 | 0.5355702 | 11.43605 |
| KEGG_PATHWAY           | mmu04910:Insulin signaling pathway                                                               | 12    | 1.45278 | 0.018519 | PPP1R3D,PPP1CA,EIF4EBP1,PHKB,PYGL,GRB2,PRKAG1,FASN,RAF1,MAPK10,BAD,IRS1                                 | 225        | 138      | 5738      | 2.217584541     | 0.94054618 | 0.6097048 | 20.02652 |
| BIOCARTA               | m_igf1Pathway:IGF-1 Signaling Pathway                                                            | 4     | 0.48426 | 0.038674 | IGF1R,GRB2,RAF1,IRS1                                                                                    | 44         | 21       | 1171      | 5.069264069     | 0.98694498 | 0.8857414 | 35.9574  |
| BIOCARTA               | m_il2rbPathway:IL-2 Receptor Beta Chain in T cell Activation                                     | 5     | 0.60533 | 0.039473 | GRB2,RAF1,JAK1,BAD,IRS1                                                                                 | 44         | 36       | 1171      | 3.696338384     | 0.98808577 | 0.7716039 | 36.55606 |
| KEGG_PATHWAY           | mmu00564:Glycerophospholipid metabolism                                                          | 7     | 0.84746 | 0.045646 | DGKZ,PCYT1A,PISD,CDS1,CHPT1,PLA2G4E,PLA2G5                                                              | 225        | 67       | 5738      | 2.664411277     | 0.99913676 | 0.8285912 | 42.79696 |

### Supplementary Table III: Boolean descriptive index

Descriptive logic (1-2-3-4-5)

- this describes the comparisons performed and number (1-5) indicates each comparison

- o 1 = capi3k/dnpi3k Sham vs. Ntg Sham
- o 2 = capi3k/dnpi3k MI vs. Ntg MI
- o 3 = Sham only (i.e. significant only in sham)
- o 4 = MI only (i.e. significant only in MI)
- o 5 = Sham and MI (significant in both)

1 = Boolean descriptor for presence (being significant and present) of pattern of interest and A, B, C, D = pattern where necessary. (0 = absence of pattern/significance).

- A = up-down (reciprocal)
- B = down-up (reciprocal)
- C = up-up (uni-directional)
- D = down-down (uni-directional)

| IDENTIFIER                  | Descriptive_logic(1-2-3-4-5) |
|-----------------------------|------------------------------|
| 0610009B22Rik               | '01A000'                     |
| 0610009L18Rik               | '01A000'                     |
| Asb5                        | '01A000'                     |
| Bphl                        | '01A000'                     |
| Cacybp                      | '01A000'                     |
| Chpt1                       | '01A000'                     |
| Dhx32                       | '01A000'                     |
| Gm410                       | '01A000'                     |
| Hspe1                       | '01A000'                     |
| LOC100044161 /// Sema3a     | '01A000'                     |
| Lym5                        | '01A000'                     |
| Ormdl1                      | '01A000'                     |
| Amn1                        | '01A001A'                    |
| Cops7b                      | '01A001A'                    |
| Skp1a                       | '01A001A'                    |
| 1700025G04Rik /// LOC545371 | '01B000'                     |
| Ahnak                       | '01B000'                     |
| B4galt6 /// LOC675709       | '01B000'                     |
| Ccnd2                       | '01B000'                     |
| Etv5                        | '01B000'                     |
| Fgl2                        | '01B000'                     |
| Gnptab                      | '01B000'                     |
| Hn1                         | '01B000'                     |
| Ik                          | '01B000'                     |
| LOC100046056 /// Pbxip1     | '01B000'                     |
| Ndr4                        | '01B000'                     |
| Tac1                        | '01B000'                     |
| Tmbim1                      | '01B000'                     |
| Upp1                        | '01B000'                     |

|                                |           |
|--------------------------------|-----------|
| Gcnt2                          | '01B001B' |
| Myo1c                          | '01B001B' |
| Nrd1                           | '01B001B' |
| Rab17                          | '01B001B' |
| Rusc2                          | '01B001B' |
| Spats1                         | '01B001B' |
| 4921527H02Rik                  | '01C000'  |
| 4930534B04Rik                  | '01C000'  |
| Aen                            | '01C000'  |
| Ard1a                          | '01C000'  |
| Atp5o /// LOC100047429         | '01C000'  |
| Bbox1                          | '01C000'  |
| Ckap2l                         | '01C000'  |
| Cmtm8                          | '01C000'  |
| Cnot2                          | '01C000'  |
| Dynlrb1                        | '01C000'  |
| Gstm5                          | '01C000'  |
| L2hgdh                         | '01C000'  |
| LOC100047123                   | '01C000'  |
| LOC100049077                   | '01C000'  |
| Mapbpip                        | '01C000'  |
| Mipol1                         | '01C000'  |
| Mrpl35                         | '01C000'  |
| Mrpl48                         | '01C000'  |
| Myl7                           | '01C000'  |
| Naif1                          | '01C000'  |
| Prkag1                         | '01C000'  |
| Prps1                          | '01C000'  |
| Ptgfr                          | '01C000'  |
| Sec14l4                        | '01C000'  |
| Sfxn4                          | '01C000'  |
| Sln                            | '01C000'  |
| Sync                           | '01C000'  |
| Tmem205                        | '01C000'  |
| Ubxn6                          | '01C000'  |
| Utp20                          | '01C000'  |
| Zfp454                         | '01C000'  |
| 0610010D20Rik                  | '01C001C' |
| 0610011L14Rik                  | '01C001C' |
| 1190005F20Rik                  | '01C001C' |
| 1700040L02Rik                  | '01C001C' |
| 2010001A14Rik                  | '01C001C' |
| 2010005J08Rik                  | '01C001C' |
| 2810016G10Rik                  | '01C001C' |
| 4921504P05Rik                  | '01C001C' |
| 4921517D16Rik                  | '01C001C' |
| 4921525O09Rik                  | '01C001C' |
| 4933416E03Rik                  | '01C001C' |
| 5930434B04Rik /// LOC100047034 | '01C001C' |
| 6030422H21Rik                  | '01C001C' |

|                               |           |
|-------------------------------|-----------|
| 6030460B20Rik                 | '01C001C' |
| 9130221J17Rik                 | '01C001C' |
| Abcf2                         | '01C001C' |
| Abcf3                         | '01C001C' |
| Acot6                         | '01C001C' |
| Adrbk1                        | '01C001C' |
| Apip /// LOC100044135         | '01C001C' |
| Atp5c1                        | '01C001C' |
| Atp5g1 /// ENSMUSG00000058357 | '01C001C' |
| Aven                          | '01C001C' |
| Bat2                          | '01C001C' |
| BC024814                      | '01C001C' |
| Bzw2                          | '01C001C' |
| C78444                        | '01C001C' |
| C85492                        | '01C001C' |
| Caskin1                       | '01C001C' |
| Ccdc64b                       | '01C001C' |
| Ccdc97                        | '01C001C' |
| Cdc37l1                       | '01C001C' |
| Cisd3                         | '01C001C' |
| Cmtm2b                        | '01C001C' |
| Col11a1                       | '01C001C' |
| Coq6                          | '01C001C' |
| Cox10                         | '01C001C' |
| Cyp2d34                       | '01C001C' |
| Dennd4c                       | '01C001C' |
| Dgat1                         | '01C001C' |
| Dgcr6                         | '01C001C' |
| Eef2k                         | '01C001C' |
| Efr3a                         | '01C001C' |
| EG624219                      | '01C001C' |
| Eif2b4                        | '01C001C' |
| Eif3m                         | '01C001C' |
| ENSMUSG00000074243 /// Josd1  | '01C001C' |
| Epha4                         | '01C001C' |
| Exosc7                        | '01C001C' |
| F13b                          | '01C001C' |
| Fam174b                       | '01C001C' |
| Fn3k                          | '01C001C' |
| Ftsj1 /// LOC100044636        | '01C001C' |
| Fxn                           | '01C001C' |
| Gspt2                         | '01C001C' |
| H2-Ke2                        | '01C001C' |
| Hmox2                         | '01C001C' |
| Hmx3                          | '01C001C' |
| Hoxd13                        | '01C001C' |
| Kcnj1                         | '01C001C' |
| Kcnk3                         | '01C001C' |
| Khdrbs3                       | '01C001C' |
| Krtap13-1                     | '01C001C' |

|                                           |           |
|-------------------------------------------|-----------|
| Lce1b                                     | '01C001C' |
| LOC100045988                              | '01C001C' |
| LOC100048812 /// Spag7                    | '01C001C' |
| LOC629952 /// OTTMUSG00000002349 /// Ppjh | '01C001C' |
| Lrpprc                                    | '01C001C' |
| Mc2r                                      | '01C001C' |
| Mecr                                      | '01C001C' |
| Mrpl11                                    | '01C001C' |
| Mrpl54                                    | '01C001C' |
| Mrrf                                      | '01C001C' |
| Msh6                                      | '01C001C' |
| Mybphl                                    | '01C001C' |
| Myg1                                      | '01C001C' |
| Ndufa11                                   | '01C001C' |
| Ndufa12                                   | '01C001C' |
| Ndufa13                                   | '01C001C' |
| Ndufs6                                    | '01C001C' |
| Ndufs7                                    | '01C001C' |
| Nqo2                                      | '01C001C' |
| Nudt14                                    | '01C001C' |
| Pctp                                      | '01C001C' |
| Pcyt1a                                    | '01C001C' |
| Pdss2                                     | '01C001C' |
| Pgbd1                                     | '01C001C' |
| Pkd2l1                                    | '01C001C' |
| Ppm1l                                     | '01C001C' |
| Psmb2                                     | '01C001C' |
| Rbm24                                     | '01C001C' |
| Ric8b                                     | '01C001C' |
| Rnmt1l                                    | '01C001C' |
| Ropn1l                                    | '01C001C' |
| Rundc1                                    | '01C001C' |
| Sdsl                                      | '01C001C' |
| Siva1                                     | '01C001C' |
| Slc24a1                                   | '01C001C' |
| Slc25a40                                  | '01C001C' |
| Slc38a3                                   | '01C001C' |
| Smarcd3                                   | '01C001C' |
| Smpd1                                     | '01C001C' |
| St3gal3                                   | '01C001C' |
| Stard10                                   | '01C001C' |
| Tmem147                                   | '01C001C' |
| Trak1                                     | '01C001C' |
| Urod                                      | '01C001C' |
| Vps4a                                     | '01C001C' |
| Wdr74                                     | '01C001C' |
| Zfp212                                    | '01C001C' |
| Zfp612                                    | '01C001C' |
| 4930504O13Rik                             | '01D000'  |
| 4933406J08Rik                             | '01D000'  |

|                    |           |
|--------------------|-----------|
| 9930032O22Rik      | '01D000'  |
| Abcc5              | '01D000'  |
| Bad                | '01D000'  |
| Cybasc3            | '01D000'  |
| D1Pas1             | '01D000'  |
| ENSMUSG00000055419 | '01D000'  |
| Fgfbp3             | '01D000'  |
| Gpr133             | '01D000'  |
| Hspb1              | '01D000'  |
| Klk10              | '01D000'  |
| Rftn2              | '01D000'  |
| Xpot               | '01D000'  |
| 1700057K13Rik      | '01D001D' |
| 1700091H14Rik      | '01D001D' |
| 2310011E23Rik      | '01D001D' |
| 2410024F20Rik      | '01D001D' |
| 4922505E12Rik      | '01D001D' |
| 4930453O03Rik      | '01D001D' |
| 4930513L20Rik      | '01D001D' |
| 4930520O04Rik      | '01D001D' |
| 4930556N09Rik      | '01D001D' |
| 4930557B21Rik      | '01D001D' |
| 5430416N02Rik      | '01D001D' |
| 6230424C14Rik      | '01D001D' |
| 6720482G16Rik      | '01D001D' |
| 9030409K20Rik      | '01D001D' |
| 9130204L05Rik      | '01D001D' |
| 9430098F02Rik      | '01D001D' |
| Alg2               | '01D001D' |
| Ankrd13d           | '01D001D' |
| Ankrd45            | '01D001D' |
| Apobec3            | '01D001D' |
| AU015247           | '01D001D' |
| B130024G19Rik      | '01D001D' |
| B3gnt2             | '01D001D' |
| BC007180           | '01D001D' |
| C630001G18Rik      | '01D001D' |
| C76872             | '01D001D' |
| Crebzf             | '01D001D' |
| Cyp4f41-ps         | '01D001D' |
| D630042F21Rik      | '01D001D' |
| D8Ertd51e          | '01D001D' |
| Defb7              | '01D001D' |
| Dgkz               | '01D001D' |
| Dnase2b            | '01D001D' |
| Efnb2              | '01D001D' |
| EG215714           | '01D001D' |
| Fance              | '01D001D' |
| Fbxl20             | '01D001D' |
| Frem1              | '01D001D' |

|                                               |           |
|-----------------------------------------------|-----------|
| Gnat1                                         | '01D001D' |
| H60a                                          | '01D001D' |
| Il31                                          | '01D001D' |
| Ing2                                          | '01D001D' |
| Kiss1r                                        | '01D001D' |
| Lamb1-1                                       | '01D001D' |
| LOC100048168 /// Sav1                         | '01D001D' |
| LOC676708                                     | '01D001D' |
| Lrrc8d                                        | '01D001D' |
| Mep1b                                         | '01D001D' |
| Myo1f                                         | '01D001D' |
| Olf157                                        | '01D001D' |
| OTTMUSG00000018358                            | '01D001D' |
| Phex                                          | '01D001D' |
| Phgdh                                         | '01D001D' |
| Preli1                                        | '01D001D' |
| Psg17                                         | '01D001D' |
| Rbm31y                                        | '01D001D' |
| Slc5a4a                                       | '01D001D' |
| Speer7-ps1 /// Speer8-ps1                     | '01D001D' |
| Tnk2                                          | '01D001D' |
| Unc5b                                         | '01D001D' |
| Zfp361                                        | '01D001D' |
| Zfp59                                         | '01D001D' |
| 100042529 /// Lgi1                            | '1A0000'  |
| 1110012N22Rik                                 | '1A0000'  |
| 1110054M08Rik                                 | '1A0000'  |
| 1600014C10Rik                                 | '1A0000'  |
| 2010305A19Rik                                 | '1A0000'  |
| 2310026E23Rik                                 | '1A0000'  |
| 2310040A07Rik                                 | '1A0000'  |
| 2410022L05Rik                                 | '1A0000'  |
| 2410166I05Rik                                 | '1A0000'  |
| 2610036D13Rik                                 | '1A0000'  |
| 2900009J06Rik                                 | '1A0000'  |
| 5830417C01Rik                                 | '1A0000'  |
| 6330578E17Rik                                 | '1A0000'  |
| A130092J06Rik                                 | '1A0000'  |
| A230067G21Rik                                 | '1A0000'  |
| A230083H22Rik                                 | '1A0000'  |
| Abcb6                                         | '1A0000'  |
| Abhd5                                         | '1A0000'  |
| Abhd6                                         | '1A0000'  |
| Acadm                                         | '1A0000'  |
| Acads                                         | '1A0000'  |
| Acsl6                                         | '1A0000'  |
| Acsm5                                         | '1A0000'  |
| Ak3l1 /// LOC100047616 /// OTTMUSG00000013175 | '1A0000'  |
| Akap1                                         | '1A0000'  |
| Als2cr2                                       | '1A0000'  |



|                        |          |
|------------------------|----------|
| Amot                   | '1A0000' |
| Amy1                   | '1A0000' |
| Ank                    | '1A0000' |
| Ankrd40                | '1A0000' |
| Ankrd50                | '1A0000' |
| Apba3                  | '1A0000' |
| Asb12                  | '1A0000' |
| Atp6v0a2               | '1A0000' |
| Auts2                  | '1A0000' |
| BC004004               | '1A0000' |
| Cand2                  | '1A0000' |
| Casq1                  | '1A0000' |
| Cdc34 /// LOC100046898 | '1A0000' |
| Cdh22 /// LOC100046008 | '1A0000' |
| Clasp1                 | '1A0000' |
| Commd9                 | '1A0000' |
| Coq3                   | '1A0000' |
| Crhr2                  | '1A0000' |
| Crip2                  | '1A0000' |
| Crybb1                 | '1A0000' |
| Csdc2                  | '1A0000' |
| Ctf1                   | '1A0000' |
| D930015E06Rik          | '1A0000' |
| Dbi                    | '1A0000' |
| Dcakd                  | '1A0000' |
| Dcun1d4                | '1A0000' |
| Derl2                  | '1A0000' |
| Dmpk                   | '1A0000' |
| Dnajib4                | '1A0000' |
| Dpyd                   | '1A0000' |
| Dusp7                  | '1A0000' |
| Egf                    | '1A0000' |
| Ehbp1                  | '1A0000' |
| Eif2b1                 | '1A0000' |
| Enpep                  | '1A0000' |
| Entpd5                 | '1A0000' |
| Epn3                   | '1A0000' |
| Fabp3                  | '1A0000' |
| Fads3                  | '1A0000' |
| Fbxl17                 | '1A0000' |
| Frap1                  | '1A0000' |
| Fsd2                   | '1A0000' |
| G6pc3                  | '1A0000' |
| Gabrg3                 | '1A0000' |
| Garnl4                 | '1A0000' |
| Gfm1                   | '1A0000' |
| Gga2                   | '1A0000' |
| Glrx                   | '1A0000' |
| Gm944                  | '1A0000' |
| Gpsn2                  | '1A0000' |

|                                  |          |
|----------------------------------|----------|
| Grb10                            | '1A0000' |
| Grb14                            | '1A0000' |
| Grb2                             | '1A0000' |
| Gsta1 /// Gsta2 /// LOC100042295 | '1A0000' |
| Hdhd3                            | '1A0000' |
| Hspb2                            | '1A0000' |
| Hspb3                            | '1A0000' |
| Hspb8                            | '1A0000' |
| Hspd1                            | '1A0000' |
| Igsf1                            | '1A0000' |
| Iqgap2                           | '1A0000' |
| Iqwd1                            | '1A0000' |
| Itgb1bp2                         | '1A0000' |
| Kcng2                            | '1A0000' |
| Kcnj3                            | '1A0000' |
| Klhl30                           | '1A0000' |
| Klk1b22 /// Klk1b9               | '1A0000' |
| Kremen1                          | '1A0000' |
| Ky                               | '1A0000' |
| Lactb /// LOC677144              | '1A0000' |
| Lbh                              | '1A0000' |
| Ldb3                             | '1A0000' |
| Letm1                            | '1A0000' |
| Lgi1                             | '1A0000' |
| LOC676546 /// Mmd                | '1A0000' |
| LOC677317 /// Me1                | '1A0000' |
| Lpin1                            | '1A0000' |
| Lrrc20                           | '1A0000' |
| Lycat                            | '1A0000' |
| Magi3                            | '1A0000' |
| Mal                              | '1A0000' |
| Mapk10                           | '1A0000' |
| Mapre3                           | '1A0000' |
| Masp1                            | '1A0000' |
| Mgmt                             | '1A0000' |
| Mlxip                            | '1A0000' |
| Morn4                            | '1A0000' |
| Mpdz                             | '1A0000' |
| Mpi                              | '1A0000' |
| Mrpl28                           | '1A0000' |
| Mrpl44                           | '1A0000' |
| Mrps34                           | '1A0000' |
| Mrps6                            | '1A0000' |
| Msra                             | '1A0000' |
| Mtus1                            | '1A0000' |
| Mybpc2                           | '1A0000' |
| Myo5b                            | '1A0000' |
| Neurl2                           | '1A0000' |
| Nkiras1                          | '1A0000' |
| Nlrx1                            | '1A0000' |

|          |          |
|----------|----------|
| Nova1    | '1A0000' |
| Nqo1     | '1A0000' |
| Nudt12   | '1A0000' |
| Nudt4    | '1A0000' |
| Nupl2    | '1A0000' |
| Oma1     | '1A0000' |
| Oplah    | '1A0000' |
| Osbp1a   | '1A0000' |
| Osbp6    | '1A0000' |
| P2ry2    | '1A0000' |
| P4ha2    | '1A0000' |
| Palb2    | '1A0000' |
| Pdlim7   | '1A0000' |
| Pex11a   | '1A0000' |
| Pex19    | '1A0000' |
| Phkb     | '1A0000' |
| Phtf2    | '1A0000' |
| Pkia     | '1A0000' |
| Pla2g4e  | '1A0000' |
| Pla2g5   | '1A0000' |
| Pm20d1   | '1A0000' |
| Pnpla8   | '1A0000' |
| Polrmt   | '1A0000' |
| Ppapdc3  | '1A0000' |
| Prdx6    | '1A0000' |
| Prkrir   | '1A0000' |
| Prlr     | '1A0000' |
| Psma4    | '1A0000' |
| Rad17    | '1A0000' |
| Raf1     | '1A0000' |
| Rgma     | '1A0000' |
| Rnf10    | '1A0000' |
| Rnf11    | '1A0000' |
| Rnf123   | '1A0000' |
| Rnf5     | '1A0000' |
| Rras2    | '1A0000' |
| Rxrg     | '1A0000' |
| Sacs     | '1A0000' |
| Sardh    | '1A0000' |
| Satb1    | '1A0000' |
| Scube2   | '1A0000' |
| Sema3c   | '1A0000' |
| Setmar   | '1A0000' |
| Sh3gl2   | '1A0000' |
| Sh3rf2   | '1A0000' |
| Slc22a3  | '1A0000' |
| Slc25a20 | '1A0000' |
| Slc25a26 | '1A0000' |
| Slc25a42 | '1A0000' |
| Slc36a2  | '1A0000' |

|                            |           |
|----------------------------|-----------|
| Slc37a4                    | '1A0000'  |
| Smap2                      | '1A0000'  |
| Spna1                      | '1A0000'  |
| St3gal5                    | '1A0000'  |
| Stom                       | '1A0000'  |
| Suox                       | '1A0000'  |
| Synj2                      | '1A0000'  |
| Synpo2                     | '1A0000'  |
| Timm22                     | '1A0000'  |
| Tmem141                    | '1A0000'  |
| Tmem38b                    | '1A0000'  |
| Tmem53                     | '1A0000'  |
| Tpst2                      | '1A0000'  |
| Trim7                      | '1A0000'  |
| Tsc22d4                    | '1A0000'  |
| Txndc13                    | '1A0000'  |
| Ube2h                      | '1A0000'  |
| Ube2r2                     | '1A0000'  |
| Wdr20a                     | '1A0000'  |
| Wwp1                       | '1A0000'  |
| Xpnpep1                    | '1A0000'  |
| Xpo4                       | '1A0000'  |
| 2310022A10Rik              | '1A001A0' |
| 2400001E08Rik /// EG433216 | '1A001A0' |
| 2900046G09Rik              | '1A001A0' |
| 4833439L19Rik              | '1A001A0' |
| 9030418K01Rik              | '1A001A0' |
| Ahsa2                      | '1A001A0' |
| Alpk2                      | '1A001A0' |
| Ankrd23                    | '1A001A0' |
| Arhgef7                    | '1A001A0' |
| B230337E12Rik              | '1A001A0' |
| BC062109                   | '1A001A0' |
| Brca2                      | '1A001A0' |
| Camk2g /// LOC100045547    | '1A001A0' |
| Cat                        | '1A001A0' |
| Cd151                      | '1A001A0' |
| Cds1                       | '1A001A0' |
| Comt1                      | '1A001A0' |
| Cryab                      | '1A001A0' |
| Dag1                       | '1A001A0' |
| Ddah1                      | '1A001A0' |
| Dtx2                       | '1A001A0' |
| E130311K13Rik              | '1A001A0' |
| Egln3                      | '1A001A0' |
| Erlin2                     | '1A001A0' |
| Fahd1                      | '1A001A0' |
| Finc                       | '1A001A0' |
| Gnao1                      | '1A001A0' |
| Grit                       | '1A001A0' |

|                      |           |
|----------------------|-----------|
| Hfe2                 | '1A001A0' |
| Hisppd2a             | '1A001A0' |
| Hspb6                | '1A001A0' |
| Htatif2              | '1A001A0' |
| Josd2                | '1A001A0' |
| Lmcd1                | '1A001A0' |
| LOC674712 /// Ptdss1 | '1A001A0' |
| Loh12cr1             | '1A001A0' |
| Lynx1                | '1A001A0' |
| Mad1l1               | '1A001A0' |
| Map1lc3a             | '1A001A0' |
| Mettl9               | '1A001A0' |
| Mllt11               | '1A001A0' |
| Nkain1               | '1A001A0' |
| Nr2f6                | '1A001A0' |
| Nudt18               | '1A001A0' |
| Palmd                | '1A001A0' |
| Park7                | '1A001A0' |
| Pcnx                 | '1A001A0' |
| Rab4a                | '1A001A0' |
| Rock2                | '1A001A0' |
| Setd7                | '1A001A0' |
| Slc17a7              | '1A001A0' |
| Slc45a4              | '1A001A0' |
| Smcr7                | '1A001A0' |
| Srl                  | '1A001A0' |
| Srxn1                | '1A001A0' |
| Strn3                | '1A001A0' |
| Suds3                | '1A001A0' |
| Tmed8                | '1A001A0' |
| Trim35               | '1A001A0' |
| Ttc7b                | '1A001A0' |
| Ube2d1               | '1A001A0' |
| Usp10                | '1A001A0' |
| Usp45                | '1A001A0' |
| Wfs1                 | '1A001A0' |
| Wrb                  | '1A001A0' |
| Zscan20              | '1A001C0' |
| Adi1                 | '1A1A100' |
| Adra1b               | '1A1A100' |
| Aox1                 | '1A1A100' |
| Atf7ip               | '1A1A100' |
| Capn3                | '1A1A100' |
| Chac2                | '1A1A100' |
| Clu                  | '1A1A100' |
| Creg1                | '1A1A100' |
| Creg1 /// Pappa2     | '1A1A100' |
| Dbh                  | '1A1A100' |
| Dnaic1               | '1A1A100' |
| Itgb6                | '1A1A100' |

|                                    |           |
|------------------------------------|-----------|
| Kbtbd10                            | '1A1A100' |
| Kcnk1                              | '1A1A100' |
| Krt222                             | '1A1A100' |
| Lrtm1                              | '1A1A100' |
| Mboat2                             | '1A1A100' |
| Mrgprh                             | '1A1A100' |
| Mrps12                             | '1A1A100' |
| Myl1                               | '1A1A100' |
| Ociad2                             | '1A1A100' |
| Pisd                               | '1A1A100' |
| Ppp1r3d                            | '1A1A100' |
| Pstk                               | '1A1A100' |
| Rab40b                             | '1A1A100' |
| Sar1b                              | '1A1A100' |
| Scn4b                              | '1A1A100' |
| Slc47a1                            | '1A1A100' |
| Thrsp                              | '1A1A100' |
| Tmprss4                            | '1A1A100' |
| 1110034G24Rik                      | '1B0000'  |
| 1700012D01Rik                      | '1B0000'  |
| 1810027O10Rik                      | '1B0000'  |
| 2010002M12Rik                      | '1B0000'  |
| 2310043N10Rik                      | '1B0000'  |
| 2410005O16Rik                      | '1B0000'  |
| 2700060E02Rik                      | '1B0000'  |
| 4933406E20Rik                      | '1B0000'  |
| 9830115L13Rik /// Zc3hav1          | '1B0000'  |
| A530016L24Rik                      | '1B0000'  |
| Acbd4                              | '1B0000'  |
| Ak2 /// LOC100047005               | '1B0000'  |
| Ap4s1                              | '1B0000'  |
| Arhgap9                            | '1B0000'  |
| Armcx3 /// LOC100044266            | '1B0000'  |
| Bcnp1                              | '1B0000'  |
| Btg3 /// EG654432 /// LOC100048453 | '1B0000'  |
| Camk2n1                            | '1B0000'  |
| Card10                             | '1B0000'  |
| Ccbl2                              | '1B0000'  |
| Cdkl1                              | '1B0000'  |
| Cetn3                              | '1B0000'  |
| Chchd3                             | '1B0000'  |
| Cnksr1                             | '1B0000'  |
| Cnksr3                             | '1B0000'  |
| Cox17                              | '1B0000'  |
| D10Wsu52e                          | '1B0000'  |
| Ddx1                               | '1B0000'  |
| Dnajb6                             | '1B0000'  |
| Doc2g                              | '1B0000'  |
| Ebp                                | '1B0000'  |
| Ehd4                               | '1B0000'  |

|                                                    |          |
|----------------------------------------------------|----------|
| Eif2a                                              | '1B0000' |
| Eif4ebp1                                           | '1B0000' |
| ENSMUSG00000072940 /// Rps28                       | '1B0000' |
| Exoc6                                              | '1B0000' |
| Ezh1                                               | '1B0000' |
| Fgf13                                              | '1B0000' |
| Fnip2                                              | '1B0000' |
| Gabarap                                            | '1B0000' |
| Gcat                                               | '1B0000' |
| Gcnt1                                              | '1B0000' |
| Ggnbp2                                             | '1B0000' |
| Gnb2l1                                             | '1B0000' |
| Gnb3                                               | '1B0000' |
| H47                                                | '1B0000' |
| Hint2                                              | '1B0000' |
| Hsd17b10                                           | '1B0000' |
| Igfbp3                                             | '1B0000' |
| Imp3                                               | '1B0000' |
| Isyna1                                             | '1B0000' |
| Klhl13                                             | '1B0000' |
| Lamb3                                              | '1B0000' |
| Las1l                                              | '1B0000' |
| Lmo2 /// LOC100048263                              | '1B0000' |
| LOC100044627 /// Rpl23                             | '1B0000' |
| LOC100045332 /// LOC636901 /// Rpsa                | '1B0000' |
| LOC100047324 /// Sesn1                             | '1B0000' |
| Mamdc2                                             | '1B0000' |
| Mrps24                                             | '1B0000' |
| Mylk3                                              | '1B0000' |
| Obscn                                              | '1B0000' |
| OTTMUSG00000016200 /// OTTMUSG00000022847 /// Rps8 | '1B0000' |
| OTTMUSG00000016644                                 | '1B0000' |
| Perp                                               | '1B0000' |
| Phc3                                               | '1B0000' |
| Pold2                                              | '1B0000' |
| Polr2g                                             | '1B0000' |
| Ppp1ca                                             | '1B0000' |
| Prps2                                              | '1B0000' |
| Psmc3                                              | '1B0000' |
| Ptpn14                                             | '1B0000' |
| Pygl                                               | '1B0000' |
| Rarres2                                            | '1B0000' |
| Rhou                                               | '1B0000' |
| Rnaseh2b                                           | '1B0000' |
| Rpl18a                                             | '1B0000' |
| Rplp1                                              | '1B0000' |
| Rps17                                              | '1B0000' |
| Rps3                                               | '1B0000' |
| Rps4x                                              | '1B0000' |
| Sepp1                                              | '1B0000' |

|                                                                            |           |
|----------------------------------------------------------------------------|-----------|
| Serpinb6b                                                                  | '1B0000'  |
| Shfm1                                                                      | '1B0000'  |
| Spcs1                                                                      | '1B0000'  |
| Stk39                                                                      | '1B0000'  |
| Tcp11l2                                                                    | '1B0000'  |
| Timp3                                                                      | '1B0000'  |
| Tmem128                                                                    | '1B0000'  |
| Tmem71                                                                     | '1B0000'  |
| Tomm7                                                                      | '1B0000'  |
| Tpd52l1                                                                    | '1B0000'  |
| Trappc6a                                                                   | '1B0000'  |
| Ung                                                                        | '1B0000'  |
| Vamp5                                                                      | '1B0000'  |
| Wipf3                                                                      | '1B0000'  |
| Xbp1                                                                       | '1B0000'  |
| Xpo1                                                                       | '1B0000'  |
| Ypel3                                                                      | '1B0000'  |
| Zfp187                                                                     | '1B0000'  |
| Zfp383                                                                     | '1B0000'  |
| Zfyve21                                                                    | '1B0000'  |
| Zmym5                                                                      | '1B0000'  |
| Mosc2                                                                      | '1B001A0' |
| 100038991 /// 100043296 /// ENSMUSG00000069439 /// Rpl35                   | '1B001B0' |
| 100038991 /// Rpl35                                                        | '1B001B0' |
| 100040123 /// EG383032 /// EG665772 /// LOC674335 /// Rps17                | '1B001B0' |
| 100040123 /// Rps17                                                        | '1B001B0' |
| 100041163 /// 100041478 /// ENSMUSG00000063556 /// LOC100046821 /// Rpl23a | '1B001B0' |
| 100041237 /// Nudc /// Nudc-ps1                                            | '1B001B0' |
| 100041294 /// Supt4h1                                                      | '1B001B0' |
| 100042986 /// 668941 /// Rpl37a                                            | '1B001B0' |
| 100043039 /// ENSMUSG00000066757 /// OTTMUSG00000002238 /// Sec61g         | '1B001B0' |
| 100043481 /// OTTMUSG00000009529 /// Rpl37                                 | '1B001B0' |
| 100043718 /// LOC100048508 /// OTTMUSG00000012957 /// Rpl36                | '1B001B0' |
| 1600020E01Rik                                                              | '1B001B0' |
| 2310005N03Rik                                                              | '1B001B0' |
| 2310016C16Rik                                                              | '1B001B0' |
| 2310016E02Rik                                                              | '1B001B0' |
| 2810004N23Rik /// Setd6                                                    | '1B001B0' |
| 2900010J23Rik                                                              | '1B001B0' |
| 677010 /// EG667779 /// OTTMUSG00000005566 /// Rpl30                       | '1B001B0' |
| Acbd7                                                                      | '1B001B0' |
| Adcy6                                                                      | '1B001B0' |
| Aldh7a1                                                                    | '1B001B0' |
| Anapc11                                                                    | '1B001B0' |
| Anapc13                                                                    | '1B001B0' |
| Ankrd29                                                                    | '1B001B0' |
| Asb11                                                                      | '1B001B0' |
| BC023892                                                                   | '1B001B0' |
| Bloc1s1                                                                    | '1B001B0' |
| Brcc3                                                                      | '1B001B0' |



|                                                                             |           |
|-----------------------------------------------------------------------------|-----------|
| Ccdc5                                                                       | '1B001B0' |
| Ccrl2                                                                       | '1B001B0' |
| Cdc123                                                                      | '1B001B0' |
| Cryz11                                                                      | '1B001B0' |
| Ctnnal1                                                                     | '1B001B0' |
| D630004K10Rik                                                               | '1B001B0' |
| Dcxr                                                                        | '1B001B0' |
| Dhrs7                                                                       | '1B001B0' |
| Efcab2                                                                      | '1B001B0' |
| EG621100 /// OTTMUSG0000001643 /// Rpl27                                    | '1B001B0' |
| EG625298 /// ENSMUSG00000066362 /// LOC100044992 /// LOC100048340 /// Rps13 | '1B001B0' |
| EG627737 /// mCG_130059 /// Rpl22                                           | '1B001B0' |
| EG629116 /// EG668041 /// LOC677113 /// Rps24                               | '1B001B0' |
| EG629116 /// LOC677113 /// Rps24                                            | '1B001B0' |
| EG640050 /// Rps7                                                           | '1B001B0' |
| EG668144 /// ENSMUSG00000062611 /// Rps3a                                   | '1B001B0' |
| Eif3e                                                                       | '1B001B0' |
| Eif3k                                                                       | '1B001B0' |
| ENSMUSG00000050299 /// Fau                                                  | '1B001B0' |
| ENSMUSG00000059775 /// LOC100047845 /// Rps26                               | '1B001B0' |
| ENSMUSG00000069117 /// LOC100047828 /// Rps18                               | '1B001B0' |
| Fasn                                                                        | '1B001B0' |
| Fbln1                                                                       | '1B001B0' |
| Gas5                                                                        | '1B001B0' |
| Gchfr                                                                       | '1B001B0' |
| Gtf2b                                                                       | '1B001B0' |
| Hddc2                                                                       | '1B001B0' |
| Hebp1                                                                       | '1B001B0' |
| Hint3                                                                       | '1B001B0' |
| Igbp1                                                                       | '1B001B0' |
| Immp2l                                                                      | '1B001B0' |
| Irak1bp1                                                                    | '1B001B0' |
| Irf2bp2                                                                     | '1B001B0' |
| Jak1                                                                        | '1B001B0' |
| Krtcap2                                                                     | '1B001B0' |
| LOC100039355 /// Rps16                                                      | '1B001B0' |
| LOC100045856 /// Sunc1                                                      | '1B001B0' |
| LOC100046668 /// OTTMUSG00000022083 /// Rps23                               | '1B001B0' |
| LOC100048508 /// OTTMUSG00000012957 /// Rpl36                               | '1B001B0' |
| Lsm3                                                                        | '1B001B0' |
| Lyar                                                                        | '1B001B0' |
| Mecp2                                                                       | '1B001B0' |
| Mfap1a /// Mfap1b                                                           | '1B001B0' |
| Mxi1                                                                        | '1B001B0' |
| Nenf                                                                        | '1B001B0' |
| Nsmce4a                                                                     | '1B001B0' |
| OTTMUSG00000004411 /// Uba52                                                | '1B001B0' |
| OTTMUSG00000007332                                                          | '1B001B0' |
| OTTMUSG00000022086 /// Rpl10a                                               | '1B001B0' |
| OTTMUSG00000022843 /// Rpl5                                                 | '1B001B0' |

|                       |           |
|-----------------------|-----------|
| Pcbd2                 | '1B001B0' |
| Pdcd5                 | '1B001B0' |
| Pfdn5                 | '1B001B0' |
| Pigf                  | '1B001B0' |
| Pigp                  | '1B001B0' |
| Polb                  | '1B001B0' |
| Polr2e                | '1B001B0' |
| Ppp1r11               | '1B001B0' |
| Rabac1                | '1B001B0' |
| Rbp4                  | '1B001B0' |
| Rdm1                  | '1B001B0' |
| Retn                  | '1B001B0' |
| Rit1                  | '1B001B0' |
| Rnf114                | '1B001B0' |
| Rpl11                 | '1B001B0' |
| Rpl12                 | '1B001B0' |
| Rpl18                 | '1B001B0' |
| Rpl23                 | '1B001B0' |
| Rpl7                  | '1B001B0' |
| Rplp0                 | '1B001B0' |
| Rps15                 | '1B001B0' |
| Rps21                 | '1B001B0' |
| Rps25                 | '1B001B0' |
| Rps27                 | '1B001B0' |
| Rps5                  | '1B001B0' |
| Rps7                  | '1B001B0' |
| Rps9                  | '1B001B0' |
| Selk                  | '1B001B0' |
| Smoc2                 | '1B001B0' |
| Smpd13a               | '1B001B0' |
| Snrpe                 | '1B001B0' |
| Spa17                 | '1B001B0' |
| Stag2                 | '1B001B0' |
| Stxbp6                | '1B001B0' |
| Them2                 | '1B001B0' |
| Tinagl1               | '1B001B0' |
| Tlcd1                 | '1B001B0' |
| Tusc3                 | '1B001B0' |
| Txndc16               | '1B001B0' |
| Wrnip1                | '1B001B0' |
| 1700025G04Rik         | '1B1B100' |
| 2310056P07Rik         | '1B1B100' |
| Abcg2                 | '1B1B100' |
| Akt1 /// LOC100047666 | '1B1B100' |
| Atpif1                | '1B1B100' |
| Bex1                  | '1B1B100' |
| Ccni                  | '1B1B100' |
| Cobl                  | '1B1B100' |
| Dusp4                 | '1B1B100' |
| Ednra                 | '1B1B100' |

|                               |                  |
|-------------------------------|------------------|
| Hrasls3                       | '1B1B100'        |
| Igf1r                         | '1B1B100'        |
| Irs1                          | '1B1B100'        |
| Klhdc2                        | '1B1B100'        |
| LOC100045031 /// Tceal8       | '1B1B100'        |
| LOC672215 /// Ntn1            | '1B1B100'        |
| Mak10                         | '1B1B100'        |
| Myom2                         | '1B1B100'        |
| Plcd3                         | '1B1B100'        |
| S100a13                       | '1B1B100'        |
| Tfpi                          | '1B1B100'        |
| Tmem100                       | '1B1B100'        |
| Tmem120a                      | '1B1B100'        |
| Tmem164                       | '1B1B100'        |
| Dnajc4                        | '1B1C100'        |
| Mrpl23 /// OTTMUSG00000013301 | '1B1C100'        |
| 2900011O08Rik                 | '1C0000'         |
| 3200001D21Rik                 | '1C0000'         |
| As3mt                         | '1C0000'         |
| Btbd11                        | '1C0000'         |
| C79557                        | '1C0000'         |
| D330028D13Rik                 | '1C0000'         |
| Dleu2                         | '1C0000'         |
| EG226957                      | '1C0000'         |
| Gpr137c                       | '1C0000'         |
| Lrrtm4                        | '1C0000'         |
| Mtrf1l                        | '1C0000'         |
| Qsox2                         | '1C0000'         |
| Tyrp1                         | '1C0000'         |
|                               | 328235 '1C001C0' |
| 1300002E11Rik                 | '1C001C0'        |
| 1500004A13Rik                 | '1C001C0'        |
| 1700021P04Rik                 | '1C001C0'        |
| 1700061J05Rik                 | '1C001C0'        |
| 1700074P13Rik                 | '1C001C0'        |
| 1700105P06Rik                 | '1C001C0'        |
| 2510049J12Rik                 | '1C001C0'        |
| 2700049P18Rik                 | '1C001C0'        |
| 4921525D07Rik                 | '1C001C0'        |
| 4930466I24Rik                 | '1C001C0'        |
| 4930521A18Rik                 | '1C001C0'        |
| 4930563P21Rik                 | '1C001C0'        |
| 4931423N10Rik                 | '1C001C0'        |
| 4933431M02Rik                 | '1C001C0'        |
| 6030419C18Rik                 | '1C001C0'        |
| 6230400D17Rik                 | '1C001C0'        |
| 6330408A02Rik                 | '1C001C0'        |
| 9030420N05Rik                 | '1C001C0'        |
| 9330199C07Rik                 | '1C001C0'        |
| A430088P11Rik                 | '1C001C0'        |

|                                      |           |
|--------------------------------------|-----------|
| A930003G23Rik                        | '1C001C0' |
| Al448005                             | '1C001C0' |
| Al480526                             | '1C001C0' |
| Akap10                               | '1C001C0' |
| Aldob                                | '1C001C0' |
| C79468                               | '1C001C0' |
| C80719                               | '1C001C0' |
| C86544                               | '1C001C0' |
| Cdx4                                 | '1C001C0' |
| Chd6                                 | '1C001C0' |
| D13Ertd212e                          | '1C001C0' |
| D4Ertd199e                           | '1C001C0' |
| D5Ertd159e                           | '1C001C0' |
| Dalrd3 /// Wdr6                      | '1C001C0' |
| Dleu7                                | '1C001C0' |
| Dsc1                                 | '1C001C0' |
| EG545216 /// Glcci1 /// LOC100046012 | '1C001C0' |
| Fabp9                                | '1C001C0' |
| Fbxl19                               | '1C001C0' |
| Gabra1                               | '1C001C0' |
| Gc                                   | '1C001C0' |
| Gfap                                 | '1C001C0' |
| Gm527                                | '1C001C0' |
| Gsdmc2 /// LOC100045250              | '1C001C0' |
| Gsg1                                 | '1C001C0' |
| Hivep3 /// LOC100045240              | '1C001C0' |
| Kif4                                 | '1C001C0' |
| Krtap11-1                            | '1C001C0' |
| Krtap16-5                            | '1C001C0' |
| Lce1d                                | '1C001C0' |
| Lcorl                                | '1C001C0' |
| LOC100047468 /// Nxn1                | '1C001C0' |
| Muc13                                | '1C001C0' |
| Myo5c                                | '1C001C0' |
| Nmu                                  | '1C001C0' |
| Npas4                                | '1C001C0' |
| Olfir658                             | '1C001C0' |
| Pabpn1                               | '1C001C0' |
| Pou2f3                               | '1C001C0' |
| Ptprt                                | '1C001C0' |
| Rel                                  | '1C001C0' |
| RP23-39409.3                         | '1C001C0' |
| Serpina12                            | '1C001C0' |
| Slc6a13                              | '1C001C0' |
| Sifnl1                               | '1C001C0' |
| Syt6                                 | '1C001C0' |
| Tbx6                                 | '1C001C0' |
| Tmem151a                             | '1C001C0' |
| Trhr                                 | '1C001C0' |
| Tssk2                                | '1C001C0' |

|                                       |                 |
|---------------------------------------|-----------------|
| Tyr                                   | '1C001C0'       |
| Upb1                                  | '1C001C0'       |
| V1ra5                                 | '1C001C0'       |
| Zcchc13                               | '1C001C0'       |
| Slc39a2                               | '1C1C100'       |
| 4932431H17Rik                         | '1C1D100'       |
| D1Ertd646e                            | '1C1D100'       |
|                                       | 668215 '1D0000' |
| 4833412C15Rik                         | '1D0000'        |
| 4930428B01Rik                         | '1D0000'        |
| 9230102K24Rik                         | '1D0000'        |
| Al465300                              | '1D0000'        |
| Al646023                              | '1D0000'        |
| C730048C13Rik                         | '1D0000'        |
| Cyb561d1                              | '1D0000'        |
| Dars                                  | '1D0000'        |
| Degs1                                 | '1D0000'        |
| Derl1                                 | '1D0000'        |
| EG622268 /// Mrpl27                   | '1D0000'        |
| Gadd45b                               | '1D0000'        |
| LOC100044475 /// Nck2                 | '1D0000'        |
| LOC433466 /// Pla2g4b                 | '1D0000'        |
| Nr2c2                                 | '1D0000'        |
| Nup98                                 | '1D0000'        |
| Ptrh2                                 | '1D0000'        |
| Rer1                                  | '1D0000'        |
| Sdhd                                  | '1D0000'        |
| Sema5a                                | '1D0000'        |
| 100042741 /// LOC100046556 /// Zfp706 | '1D001D0'       |
| 1700113I22Rik                         | '1D001D0'       |
| 1810058N15Rik                         | '1D001D0'       |
| 2210011K15Rik                         | '1D001D0'       |
| 2310061A09Rik                         | '1D001D0'       |
| 4933416C03Rik                         | '1D001D0'       |
| 5730405A17Rik                         | '1D001D0'       |
| 671392 /// LOC100047898 /// Set       | '1D001D0'       |
| 6720457D02Rik                         | '1D001D0'       |
| A630035D09Rik                         | '1D001D0'       |
| Al848100                              | '1D001D0'       |
| Akr1c12                               | '1D001D0'       |
| Apol7a                                | '1D001D0'       |
| Atp13a3                               | '1D001D0'       |
| Atp8b2                                | '1D001D0'       |
| B3galt4                               | '1D001D0'       |
| BC031748                              | '1D001D0'       |
| Bmper                                 | '1D001D0'       |
| Cep120                                | '1D001D0'       |
| Crip3                                 | '1D001D0'       |
| Cxcl1                                 | '1D001D0'       |
| Cyfp1                                 | '1D001D0'       |

|                        |           |
|------------------------|-----------|
| D130062J10Rik          | '1D001D0' |
| D6Ertd527e             | '1D001D0' |
| D7Ertd1e               | '1D001D0' |
| Dnm2                   | '1D001D0' |
| Dync1i2                | '1D001D0' |
| ENSMUSG00000053185     | '1D001D0' |
| Evpl                   | '1D001D0' |
| F11                    | '1D001D0' |
| Gria4                  | '1D001D0' |
| Hmga1 /// Hmga1-rs1    | '1D001D0' |
| Klf11                  | '1D001D0' |
| Klrg1                  | '1D001D0' |
| LOC100044385           | '1D001D0' |
| LOC100045432 /// Stim1 | '1D001D0' |
| LOC541456              | '1D001D0' |
| Med15                  | '1D001D0' |
| Mobkl2b                | '1D001D0' |
| Mppe1                  | '1D001D0' |
| Pgm3                   | '1D001D0' |
| Pnlip                  | '1D001D0' |
| Pnpo                   | '1D001D0' |
| Prl7c1                 | '1D001D0' |
| Rage                   | '1D001D0' |
| Rbm15                  | '1D001D0' |
| Rcl1                   | '1D001D0' |
| Rcor3                  | '1D001D0' |
| Rhbdd1                 | '1D001D0' |
| Rmnd5b                 | '1D001D0' |
| Rnasel                 | '1D001D0' |
| Rpa1                   | '1D001D0' |
| Sdk1                   | '1D001D0' |
| Selp                   | '1D001D0' |
| Spats2                 | '1D001D0' |
| Sptlc1                 | '1D001D0' |
| Tax1bp1                | '1D001D0' |
| Tfip11                 | '1D001D0' |
| Tjp2                   | '1D001D0' |
| Tmem67                 | '1D001D0' |
| Treh                   | '1D001D0' |
| Vsx1                   | '1D001D0' |
| Wdr25                  | '1D001D0' |
| Wdr33                  | '1D001D0' |
| Zzz3                   | '1D001D0' |
| Tmem179b               | '1D1D100' |
